# Supplementary material for: A ligand-insensitive UNC5B splicing isoform regulates angiogenesis by promoting apoptosis
Source: Nat Commun. 2021 Aug 11;12:4872. doi: 10.1038/s41467-021-24998-6 (PMC8358048; doi:10.1038/s41467-021-24998-6)
Supplement: Supplementary file 4 — source data [file 41467_2021_24998_MOESM4_ESM.xlsx]

## Sheet: Figure 1
	Figure 1c
	Nova2 relative mRNA levels
	shRNA:	Ctr	Nova2
		0.013767	0.003871
		0.0156032	0.00340511
		0.013727	0.00479
	Figure 1d
	Nova2 relative mRNA levels
	siRNA:	Ctr	Nova2
		0.0167201	0.00223853
		0.0136003	0.0017673
		0.0100988	0.00177918
	Figure 1d
	Nova2 relative mRNA levels
	siRNA:	Ctr	Nova2
		0.00467	0.0007
		0.00396	0.00081
		0.00355	0.00091
		0.00488	0.00036
		0.00437	0.00043
	Figure 1g
	Nova2 relative mRNA levels
		ECs	Colon
		0.007941	0.000134
		0.00718287	5.7e-05
		0.00385	0.000119
	Figure 1f
	Nova2 relative mRNA levels
		4 h	8 h	12 h
		0.07974	0.104461	0.129528
		0.0552209	0.0898949	0.14529
		0.047647	0.10459	0.217837
	Figure 1h
	Nova2 relative mRNA levels
		embryo	neonatal	adult
		0.00759	0.010167	0.010433
		0.005406	0.009882	0.010059
		0.008207	0.009535	0.010701

## Sheet: Figure 2
	Figure 2b
	Nova2 relative mRNA levels
		IgG			CLIP NOVA2
	A	3.02393e-05	3.02393e-05	1.44036e-05	0.187737	0.175165	0.194357
	B	0.000460914	0.000460914	0.000460914	0.000460914	0.00915548	0.0168731
	C	1.80428e-05	1.80428e-05	1.80428e-05	1.80428e-05	1.80428e-05	1.80428e-05

## Sheet: Figure 3
	Figure 3b
	nova2 relative mRNA levels
		maternal	24 hpf	48 hpf
		3.66011e-06	0.0158819	0.0324797
		1.53347e-05	0.0267252	0.0493249
		8.83168e-06	0.0313261	0.0374413
	Figure 3e
	% PAV formation
	MO-ctr:	+	-	-	-
	MO-unc5b:	-	+	+	+
	unc5b mRNA:	-	-	FL	Δ8
		95	5	5	75
		98	1.8	0	56
		98	3	2.5	42
	Figure 3g
	% PAV formation
	nova2:	wt	mut	mut	mut
	unc5b mRNA:	-	-	FL	Δ8
		92	0	0	70
		95	0	0	65
		95	0	0	66.6667

## Sheet: Figure 4
	Figure 4d
	Cell death (index)
		GFP	GFP	FL	FL	Δ8	Δ8
	Netrin-1:	-	+	-	+	-	+
		1.90507	2.6974	1.01894	2.79919	3.382	1.41292
		1.7372	2.64923	1.14561	2.27077	2.87	0.847755
		1.8839	3.36725	1.10098	3.0277	2.7948	0.739321
	Figure 4g
	% PAV formation
	MO-ctr:	+	-	-	-
	MO-unc5b:	-	+	+	+
	unc5b mRNA:	-	-	Δ8	Δ8
	BAF inhibitor:	-	-	-	+
		98	3	56	4.3
		98	1.8	42	4.2
	Figure 4h
	# of nodes				# of segments
	siRNA:	Ctr	UNC5B-Δ8		siRNA:	Ctr	UNC5B-Δ8
		75	65			68	53
		55	38			56	23
		73	52			63	26
		74	44			67	46
		56	44			44	40
		50				40

## Sheet: Figure 5
	Figure 5b							Figure 5e and 5f							Figure 5e and 5f																	Figure 5g						Figure 5i						Figure 5l
	Expression of NOVA2 in COAD based on Sample types							TCGA Sample ID	Primary Tumor/Normal	Cancer Type Detailed	NOVA2 RSME	UNC5B-Δ8 RSME	TEC signature		TCGA Sample ID	clinical_sampletype	clinical_histological_type	gene_CD59	gene_COL4A1	gene_HMGB1	gene_COL1A1	gene_HEYL	gene_IGFBP7	gene_PPAP2B	gene_SPARC	gene_ARPC2	gene_LDHB	gene_PHC3	gene_POMP	gene_VIM		track_name	Neoplasm Disease Lymph Node Stage American Joint Committee on Cancer Code	Cancer Type	Cancer Type Detailed	NOVA2 RNA z		TCGA-COAD		NOVA2 expression				TCGA-COAD		UNC5B-Δ8 expression
	TCGA samples	Series 1						TCGA-3L-AA1B-01A	Primary Solid Tumor	colon adenocarcinoma	20.793	139.228	0.82048		TCGA-3L-AA1B-01A	Primary Solid Tumor	colon adenocarcinoma	5032.4	4716.63	5780.46	17008.2	315.764	4576.4	894.584	9887.33	4603	6020.79	965.184	2264.99	6460.52		TCGA-4N-A93T	N1b	Colorectal Cancer	Colon Adenocarcinoma	-0.6989		Sample ID	Days	High	Medium	Low		Sample ID	Days	High	Medium	Low
		low	q1	median	q3	high		TCGA-4N-A93T-01A	Primary Solid Tumor	colon adenocarcinoma	9.1921	5.5409	0.678291		TCGA-4N-A93T-01A	Primary Solid Tumor	colon adenocarcinoma	8369.62	1941.46	9472.18	3899.85	169.811	1672.96	277.697	2906.63	4902.76	2079.83	1413.16	3751.33	1779.85		TCGA-5M-AAT4	N0	Colorectal Cancer	Colon Adenocarcinoma	0.1475		TCGA-AZ-4323-01A	43	1				TCGA-A6-A56B-01A	1711	1
	Normal	0.126	0.351	0.584	0.79	1.314		TCGA-5M-AAT4-01A	Primary Solid Tumor	colon adenocarcinoma	21.0843	24.9111	0.757158		TCGA-5M-AAT4-01A	Primary Solid Tumor	colon adenocarcinoma	3383.39	6030.12	6219.45	15783.1	376.936	2219.45	328.743	7250.86	5073.58	13728.5	964.286	2279.69	2492.47		TCGA-5M-AAT6	N2b	Colorectal Cancer	Colon Adenocarcinoma	2.3366		TCGA-CM-6167-01A	122	0				TCGA-F4-6569-01A	409	0
	(n=41)							TCGA-5M-AAT6-01A	Primary Solid Tumor	colon adenocarcinoma	51.8426	83.867	1.5203		TCGA-5M-AAT6-01A	Primary Solid Tumor	colon adenocarcinoma	4696.02	10969.6	8636.06	177205	605.049	5654.13	723.172	48333.1	4764.27	13112.2	826.201	3399.3	14188.1		TCGA-5M-AATE	N0	Colorectal Cancer	Colon Adenocarcinoma	-0.1806		TCGA-F4-6703-01A	1091	0				TCGA-D5-6926-01A	275	0
	Primary tumor	0.028	0.412	0.664	1.049	2.089		TCGA-5M-AATE-01A	Primary Solid Tumor	colon adenocarcinoma	16.4755	56.5627	0.763398		TCGA-5M-AATE-01A	Primary Solid Tumor	colon adenocarcinoma	3463.98	5631.2	10231.3	18337.3	328.824	2524.19	687.167	9298.38	4556.86	6527.06	895.171	3194.2	3382.29		TCGA-A6-2670	N0	Colorectal Cancer	Colon Adenocarcinoma	NA		TCGA-5M-AAT6-01A	290	1				TCGA-NH-A5IV-01A	588	0
	(n=286)							TCGA-A6-2675-01A	Primary Solid Tumor	colon adenocarcinoma	19.9595	88.4367	1.21295		TCGA-A6-2675-01A	Primary Solid Tumor	colon adenocarcinoma	6661.09	8155.36	5643.7	126401	464.464	5868.11	990.425	39569.5	5288.2	5130.68	938.098	2131.89	12215.2		TCGA-A6-2671	N2	Colorectal Cancer	Colon Adenocarcinoma	NA		TCGA-F4-6569-01A	409	0				TCGA-CK-5913-01A	1561	0
								TCGA-A6-2682-01A	Primary Solid Tumor	colon adenocarcinoma	17.501	66.8171	1.29278		TCGA-A6-2682-01A	Primary Solid Tumor	colon adenocarcinoma	8320.16	10507.8	6813.54	68963.6	425.171	9529.28	615.622	42639.6	6509.33	9316.69	846.738	3175.91	10147.7		TCGA-A6-2672	N1	Colorectal Cancer	Colon Adenocarcinoma	NA		TCGA-AA-A01P-01A	1158	1				TCGA-A6-6782-01A	189	0
								TCGA-A6-2684-01A	Primary Solid Tumor	colon adenocarcinoma	22.2576	124.62	1.20687		TCGA-A6-2684-01A	Primary Solid Tumor	colon adenocarcinoma	7261.53	6515.9	8751.86	45492.1	468.8	9159.45	743.774	33125.7	7185.48	4903.62	938.064	2290.21	13029.1		TCGA-A6-2675	N0	Colorectal Cancer	Colon Adenocarcinoma	0.0674		TCGA-A6-6651-01A	259	0				TCGA-F4-6461-01A	338	1
	Figure 5c			Figure 5d				TCGA-A6-2685-01A	Primary Solid Tumor	colon adenocarcinoma	25.6209	141.705	1.31115		TCGA-A6-2685-01A	Primary Solid Tumor	colon adenocarcinoma	8284.53	7946.96	3464.66	94847.1	443.645	9926.51	1006.85	41448.3	5834.81	4373.97	744.803	2095.07	17441.4		TCGA-A6-2676	N0	Colorectal Cancer	Colon Adenocarcinoma	NA		TCGA-A6-6654-01A	399	0				TCGA-CM-6168-01A	181	0
	TCGA Sample ID	UNC5B exon 8 PSI		TCGA Sample ID	NOVA2 RSME	UNC5B-Δ8 RSME		TCGA-A6-2686-01A	Primary Solid Tumor	colon adenocarcinoma	10.2389	108.722	1.05798		TCGA-A6-2686-01A	Primary Solid Tumor	colon adenocarcinoma	6312.04	4769.38	5294	22853.2	325.695	10702.6	705.022	19887.9	4013.65	10515.4	1153.1	1984.89	12508		TCGA-A6-2677	N2	Colorectal Cancer	Colon Adenocarcinoma	NA		TCGA-A6-6782-01A	189	0				TCGA-F4-6855-01A	1077	0
	TCGA_3L_AA1B	0.7556		TCGA-3L-AA1B-01A	20.793	139.228		TCGA-A6-4105-01A	Primary Solid Tumor	colon adenocarcinoma	17.9418	45.0773	1.18183		TCGA-A6-4105-01A	Primary Solid Tumor	colon adenocarcinoma	5560.43	9692.68	8370.63	59787.3	343.458	6440.6	772.011	21501.5	5961.81	14148.9	633.09	3729.85	9199.48		TCGA-A6-2678	N1	Colorectal Cancer	Colon Adenocarcinoma	NA		TCGA-AZ-6605-01A	159	1				TCGA-CM-6165-01A	212	0
	TCGA_4N_A93T	1		TCGA-4N-A93T-01A	9.1921	5.5409		TCGA-A6-5656-01A	Primary Solid Tumor	colon adenocarcinoma	5.531	0	0.685258		TCGA-A6-5656-01A	Primary Solid Tumor	colon adenocarcinoma	4396.02	2166.48	10800.3	11315.8	138.827	1735.07	512.168	4496.68	6488.94	7082.41	948.009	4059.18	2581.86		TCGA-A6-2679	N0	Colorectal Cancer	Colon Adenocarcinoma	NA		TCGA-AA-3489-01A	214	1				TCGA-D5-6923-01A	378	0
	TCGA_4T_AA8H	0.9424		TCGA-5M-AAT4-01A	21.0843	24.9111		TCGA-A6-5657-01A	Primary Solid Tumor	colon adenocarcinoma	25.8918	258.155	1.33089		TCGA-A6-5657-01A	Primary Solid Tumor	colon adenocarcinoma	5482.06	10496.5	6692.58	116786	530.63	10131.9	773.099	31075.1	6545.76	9344.21	763.047	1750.59	17250.1		TCGA-A6-2680	N0	Colorectal Cancer	Colon Adenocarcinoma	NA		TCGA-AD-6901-01A	682	1				TCGA-F4-6459-01A	262	1
	TCGA_5M_AAT4	1		TCGA-5M-AAT6-01A	51.8426	83.867		TCGA-A6-5659-01A	Primary Solid Tumor	colon adenocarcinoma	9.3705	0.0048	0.932409		TCGA-A6-5659-01A	Primary Solid Tumor	colon adenocarcinoma	5209.15	5440	10884.3	18175.8	301.986	5051.55	903.828	13091.4	5648.28	8188.54	869.753	3554.4	5213.09		TCGA-A6-2681	N0	Colorectal Cancer	Colon Adenocarcinoma	NA		TCGA-F4-6809-01A	403	1				TCGA-D5-6531-01A	540	0
	TCGA_5M_AAT6	0.9185		TCGA-5M-AATE-01A	16.4755	56.5627		TCGA-A6-5660-01A	Primary Solid Tumor	colon adenocarcinoma	7.3024	170.987	1.03946		TCGA-A6-5660-01A	Primary Solid Tumor	colon adenocarcinoma	7287.8	6753.87	14141.8	34271	267.182	6659.36	427.835	24307.1	6302.41	6791.67	762.457	3780.5	8235.64		TCGA-A6-2682	N1	Colorectal Cancer	Colon Adenocarcinoma	-0.1076		TCGA-D5-6923-01A	378	0				TCGA-CA-6719-01A	435	0
	TCGA_5M_AATA	0.7179		TCGA-A6-2675-01A	19.9595	88.4367		TCGA-A6-5661-01A	Primary Solid Tumor	colon adenocarcinoma	6.552	0	0.876647		TCGA-A6-5661-01A	Primary Solid Tumor	colon adenocarcinoma	6241.61	4908.27	10879.6	25923	85.9951	2298.12	434.07	9235.87	6784.6	12506.1	972.973	3789.52	3475.84		TCGA-A6-2683	N0	Colorectal Cancer	Colon Adenocarcinoma	NA		TCGA-G4-6314-01A	1093	0				TCGA-AD-6895-01A	763	0
	TCGA_5M_AATE	0.8		TCGA-A6-2682-01A	17.501	66.8171		TCGA-A6-5662-01A	Primary Solid Tumor	colon adenocarcinoma	7.7922	0	1.01695		TCGA-A6-5662-01A	Primary Solid Tumor	colon adenocarcinoma	6197.4	6194.37	12151.1	24940.3	293.074	6454.98	534.632	20723.8	6303.46	5870.13	945.887	6465.8	5824.86		TCGA-A6-2684	N0	Colorectal Cancer	Colon Adenocarcinoma	0.231		TCGA-F4-6461-01A	338	1				TCGA-A6-5657-01A	367	0
	TCGA_A6_2671_Norm	0.9622		TCGA-A6-2684-01A	22.2576	124.62		TCGA-A6-5664-01A	Primary Solid Tumor	colon adenocarcinoma	20.5487	131.217	1.54606		TCGA-A6-5664-01A	Primary Solid Tumor	colon adenocarcinoma	6143.14	10358	7205.6	188876	378.751	5728.9	1107.3	44440.4	5458.03	18436.9	928.897	1564.04	16227.9		TCGA-A6-2685	N0	Colorectal Cancer	Colon Adenocarcinoma	0.4703		TCGA-F4-6570-01A	188	1				TCGA-A6-6654-01A	399	0
	TCGA_A6_2675	0.9498		TCGA-A6-2685-01A	25.6209	141.705		TCGA-A6-5665-01A	Primary Solid Tumor	colon adenocarcinoma	3.2837	0	0.673602		TCGA-A6-5665-01A	Primary Solid Tumor	colon adenocarcinoma	3896.76	2178.94	11493.3	8774.87	50.6621	1743.15	277.704	4445.13	4992.1	14511.4	760.401	2725.9	2550.35		TCGA-A6-2686	N0	Colorectal Cancer	Colon Adenocarcinoma	-0.6244		TCGA-F4-6855-01A	1077	0				TCGA-A6-6138-01A	280	0
	TCGA_A6_2675_Norm	0.8889		TCGA-A6-2686-01A	10.2389	108.722		TCGA-A6-5666-01A	Primary Solid Tumor	colon adenocarcinoma	10.6979	0	0.809899		TCGA-A6-5666-01A	Primary Solid Tumor	colon adenocarcinoma	2474.27	3801.83	14303.1	9936.83	168.11	2305.65	407.03	10148.8	5956.7	15342.8	808.456	4709.63	2884.87		TCGA-A6-3807	N2	Colorectal Cancer	Colon Adenocarcinoma	NA		TCGA-CM-6169-01A	243	0				TCGA-CM-6680-01A	91	0
	TCGA_A6_2678_Norm	0.9325		TCGA-A6-4105-01A	17.9418	45.0773		TCGA-A6-5667-01A	Primary Solid Tumor	colon adenocarcinoma	16.1102	97.4879	0.875485		TCGA-A6-5667-01A	Primary Solid Tumor	colon adenocarcinoma	4186.54	6545.84	9210.39	29349.9	287.44	3816.85	461.685	13082.8	5308.32	9377	1130.68	4066.56	5357.7		TCGA-A6-3808	N0	Colorectal Cancer	Colon Adenocarcinoma	NA		TCGA-D5-6932-01A	346	0				TCGA-QL-A97D-01A	666	0
	TCGA_A6_2679_Norm	0.9106		TCGA-A6-5656-01A	5.531	0		TCGA-A6-6137-01A	Primary Solid Tumor	colon adenocarcinoma	19.3839	161.741	0.806615		TCGA-A6-6137-01A	Primary Solid Tumor	colon adenocarcinoma	6004.38	7380.64	5275.64	13640.2	274.605	2704.05	875.043	6796.82	4429.21	7849.08	1256.72	1813.78	5570.49		TCGA-A6-3810	N0	Colorectal Cancer	Colon Adenocarcinoma	NA		TCGA-D5-6929-01A	408	0				TCGA-AD-6965-01A	805	0
	TCGA_A6_2680	0.4486		TCGA-A6-5657-01A	25.8918	258.155		TCGA-A6-6138-01A	Primary Solid Tumor	colon adenocarcinoma	31.7029	252.052	1.11039		TCGA-A6-6138-01A	Primary Solid Tumor	colon adenocarcinoma	4781.7	13294.4	10404.4	41016.3	288.043	5495.47	912.138	16856.9	5476.45	8222.83	986.866	4980.98	10552.9		TCGA-A6-4105	N0	Colorectal Cancer	Colon Adenocarcinoma	-0.0762		TCGA-A6-6142-01A	368	0				TCGA-D5-6529-01A	614	0
	TCGA_A6_2680_Norm	0.8791		TCGA-A6-5659-01A	9.3705	0.0048		TCGA-A6-6140-01A	Primary Solid Tumor	colon adenocarcinoma	15.2373	121.372	0.688685		TCGA-A6-6140-01A	Primary Solid Tumor	colon adenocarcinoma	4362.65	6692.64	9497.61	17764	101.001	1776.23	587.288	6186.77	4607.31	7845.89	952.547	2649.98	3354.38		TCGA-A6-4107	N1b	Colorectal Cancer	Colon Adenocarcinoma	NA		TCGA-F4-6460-01A	407	0				TCGA-D5-6535-01A	460	0
	TCGA_A6_2682	0.9357		TCGA-A6-5660-01A	7.3024	170.987		TCGA-A6-6141-01A	Primary Solid Tumor	colon adenocarcinoma	11.6869	93.1437	0.804505		TCGA-A6-6141-01A	Primary Solid Tumor	colon adenocarcinoma	5307.09	3847.45	7202.21	24162.4	266.339	3504.84	898.662	9837.92	4640.94	7379.36	968.168	1838.54	5689.07		TCGA-A6-5656	N0	Colorectal Cancer	Colon Adenocarcinoma	-0.9595		TCGA-F4-6854-01A	16	0				TCGA-D5-6539-01A	380	0
	TCGA_A6_2682_Norm	1		TCGA-A6-5661-01A	6.552	0		TCGA-A6-6142-01A	Primary Solid Tumor	colon adenocarcinoma	32.7151	162.867	1.70679		TCGA-A6-6142-01A	Primary Solid Tumor	colon adenocarcinoma	5903.32	19800.8	7589.89	200817	688.769	8742.51	1326.13	50443.1	5088.94	5735.65	857.018	4399.01	16815		TCGA-A6-5657	N1	Colorectal Cancer	Colon Adenocarcinoma	0.4896		TCGA-A6-6138-01A	280	0				TCGA-AZ-6600-01A	368	1
	TCGA_A6_2683_Norm	0.9197		TCGA-A6-5662-01A	7.7922	0		TCGA-A6-6648-01A	Primary Solid Tumor	colon adenocarcinoma	11.1817	65.0026	0.846704		TCGA-A6-6648-01A	Primary Solid Tumor	colon adenocarcinoma	4441.93	8305.72	12372.8	9676.75	331.131	1754	665.565	6512.83	4649.81	10540.3	1235.07	2536.72	3586.02		TCGA-A6-5659	N0	Colorectal Cancer	Colon Adenocarcinoma	-0.6862		TCGA-D5-6533-01A	775	0				TCGA-DM-A28A-01A	805	1
	TCGA_A6_2684	0.8889		TCGA-A6-5664-01A	20.5487	131.217		TCGA-A6-6649-01A	Primary Solid Tumor	colon adenocarcinoma	28.7013	0	0.991926		TCGA-A6-6649-01A	Primary Solid Tumor	colon adenocarcinoma	5280.4	12154.3	5797.34	25088.7	352.388	5499.48	833.612	12182.7	6487.76	5740.57	1070.24	1457.71	9372.34		TCGA-A6-5660	N2b	Colorectal Cancer	Colon Adenocarcinoma	-0.8334		TCGA-AD-6964-01A	331	1				TCGA-DM-A28C-01A	1825	0
	TCGA_A6_2684_Norm	0.916		TCGA-A6-5665-01A	3.2837	0		TCGA-A6-6650-01A	Primary Solid Tumor	colon adenocarcinoma	12.033	179.795	0.901311		TCGA-A6-6650-01A	Primary Solid Tumor	colon adenocarcinoma	3749.64	9775.84	12809.7	13851.1	329.937	2211.74	577.196	6930.62	4924.6	10785.8	1341.1	4262.79	2828.92		TCGA-A6-5661	N0	Colorectal Cancer	Colon Adenocarcinoma	-0.8868		TCGA-CM-5344-01A	304	0				TCGA-G4-6314-01A	1093	0
	TCGA_A6_2685	0.8946		TCGA-A6-5666-01A	10.6979	0		TCGA-A6-6651-01A	Primary Solid Tumor	colon adenocarcinoma	47.7437	83.0335	1.8724		TCGA-A6-6651-01A	Primary Solid Tumor	colon adenocarcinoma	7196.31	16523.5	7907.03	129474	758.036	12785.7	1803.79	50370.9	6300.49	9035.28	1090.99	1976.76	29845.8		TCGA-A6-5662	N2	Colorectal Cancer	Colon Adenocarcinoma	-0.7986		TCGA-CM-6674-01A	150	0				TCGA-CM-6161-01A	212	0
	TCGA_A6_2685_Norm	0.9009		TCGA-A6-5667-01A	16.1102	97.4879		TCGA-A6-6652-01A	Primary Solid Tumor	colon adenocarcinoma	7.8982	0	0.683896		TCGA-A6-6652-01A	Primary Solid Tumor	colon adenocarcinoma	3139.53	5580.52	6806.49	15953	140.851	2422.55	1073.28	6385.7	4602.46	4083.81	1068.01	2687.58	3034.73		TCGA-A6-5664	N2a	Colorectal Cancer	Colon Adenocarcinoma	0.1093		TCGA-AZ-6600-01A	368	1				TCGA-A6-6650-01A	278	0
	TCGA_A6_2686	0.7442		TCGA-A6-6137-01A	19.3839	161.741		TCGA-A6-6653-01A	Primary Solid Tumor	colon adenocarcinoma	18.6704	71.2526	0.833272		TCGA-A6-6653-01A	Primary Solid Tumor	colon adenocarcinoma	4411.76	11989.4	7349.06	73613.7	174.593	3105.84	364.829	15139.1	5730.79	5377.07	524.284	2117.32	7178		TCGA-A6-5665	N0	Colorectal Cancer	Colon Adenocarcinoma	-1.1195		TCGA-D5-6536-01A	543	0				TCGA-CM-6674-01A	150	0
	TCGA_A6_2686_Norm	0.9687		TCGA-A6-6138-01A	31.7029	252.052		TCGA-A6-6654-01A	Primary Solid Tumor	colon adenocarcinoma	47.2585	253.82	1.90848		TCGA-A6-6654-01A	Primary Solid Tumor	colon adenocarcinoma	8770.36	16512.5	8769.9	268056	556.55	10496.4	1085.11	66218.9	7400.78	4162.42	752.466	2595.55	26528		TCGA-A6-5666	N0	Colorectal Cancer	Colon Adenocarcinoma	-0.5918		TCGA-CM-5349-01A	335	0				TCGA-CM-6169-01A	243	0
	TCGA_A6_3808	1		TCGA-A6-6140-01A	15.2373	121.372		TCGA-A6-6782-01A	Primary Solid Tumor	colon adenocarcinoma	46.7372	316.192	1.63538		TCGA-A6-6782-01A	Primary Solid Tumor	colon adenocarcinoma	6141.98	13073.6	11414.9	125879	813.933	10915.3	1250	44661.4	6309.08	7754.41	1212.52	4530.86	13467.4		TCGA-A6-5667	N1a	Colorectal Cancer	Colon Adenocarcinoma	-0.2066		TCGA-CA-6719-01A	435	0				TCGA-CA-5797-01A	100	0
	TCGA_A6_4105	0.8358		TCGA-A6-6141-01A	11.6869	93.1437		TCGA-A6-A567-01A	Primary Solid Tumor	colon adenocarcinoma	4.1376	0.0833	0.891819		TCGA-A6-A567-01A	Primary Solid Tumor	colon adenocarcinoma	4544.09	5699.51	9390.23	26396.7	287.561	3859.32	807.861	17029.2	6889.06	6481.51	1197.83	3220.07	4728.21		TCGA-A6-6137	N1c	Colorectal Cancer	Colon Adenocarcinoma	0.0264		TCGA-A6-6649-01A	328	0				TCGA-AZ-4323-01A	43	1
	TCGA_A6_5657	0.8463		TCGA-A6-6142-01A	32.7151	162.867		TCGA-A6-A56B-01A	Primary Solid Tumor	colon adenocarcinoma	19.025	480.905	1.0682		TCGA-A6-A56B-01A	Primary Solid Tumor	colon adenocarcinoma	5953.63	8877.53	7908.44	109795	506.54	3269.92	505.351	28503	4941.74	5764.57	1084.42	2884.66	7876.34		TCGA-A6-6138	N0	Colorectal Cancer	Colon Adenocarcinoma	0.9032		TCGA-AA-3496-01A	31	0				TCGA-A6-5660-01A	342	0
	TCGA_A6_5659	0.9106		TCGA-A6-6648-01A	11.1817	65.0026		TCGA-A6-A5ZU-01A	Primary Solid Tumor	colon adenocarcinoma	10.6988	0	1.38885		TCGA-A6-A5ZU-01A	Primary Solid Tumor	colon adenocarcinoma	5111.33	11043.8	9444.33	107718	567.034	5988.63	1438.98	37274.5	5948.51	771.648	1059.18	5337.35	12188.6		TCGA-A6-6140	N0	Colorectal Cancer	Colon Adenocarcinoma	-0.2687		TCGA-D5-6926-01A	275	0				TCGA-D5-6533-01A	775	0
	TCGA_A6_5659_Norm	0.9412		TCGA-A6-6649-01A	28.7013	0		TCGA-AA-3489-01A	Primary Solid Tumor	colon adenocarcinoma	41.7299	143.39	1.93935		TCGA-AA-3489-01A	Primary Solid Tumor	colon adenocarcinoma	5610.77	21430.6	9002.66	210277	955.235	10869.1	1580.8	63860.8	5805.77	7639.98	1147.57	2000	19419.9		TCGA-A6-6141	N0	Colorectal Cancer	Colon Adenocarcinoma	-0.5214		TCGA-F4-6807-01A	494	0				TCGA-AD-6548-01A	650	0
	TCGA_A6_5660	0.8675		TCGA-A6-6650-01A	12.033	179.795		TCGA-AA-3492-01A	Primary Solid Tumor	colon adenocarcinoma	10.7502	0	0.844173		TCGA-AA-3492-01A	Primary Solid Tumor	colon adenocarcinoma	3382.41	4570.3	7925.83	28372.7	142.685	6068.98	376.746	26736.7	6791.2	8369.52	532.135	3200.14	6159.38		TCGA-A6-6142	N1a	Colorectal Cancer	Colon Adenocarcinoma	0.9752		TCGA-CK-4948-01B	1825	0				TCGA-AZ-6607-01A	97	1
	TCGA_A6_5662	0.916		TCGA-A6-6651-01A	47.7437	83.0335		TCGA-AA-3495-01A	Primary Solid Tumor	colon adenocarcinoma	9.1347	0	0.768922		TCGA-AA-3495-01A	Primary Solid Tumor	colon adenocarcinoma	5791.85	5325.51	8487.54	15116.9	190.386	3644.25	556.253	10507.3	6076.95	4886.08	743.273	2913.96	4903.39		TCGA-A6-6648	N0	Colorectal Cancer	Colon Adenocarcinoma	-0.5573		TCGA-F4-6805-01A	496	0				TCGA-D5-6932-01A	346	0
	TCGA_A6_5662_Norm	0.9532		TCGA-A6-6652-01A	7.8982	0		TCGA-AA-3496-01A	Primary Solid Tumor	colon adenocarcinoma	28.15	147.526	1.21651		TCGA-AA-3496-01A	Primary Solid Tumor	colon adenocarcinoma	4610.4	15143.5	7559.11	70301.8	501.733	6017.48	1323.47	26058.2	5627.52	11050.1	872.237	1975.06	8757.56		TCGA-A6-6649	N1b	Colorectal Cancer	Colon Adenocarcinoma	0.6896		TCGA-D5-6922-01A	308	0				TCGA-A6-6142-01A	368	0
	TCGA_A6_5664	0.8932		TCGA-A6-6653-01A	18.6704	71.2526		TCGA-AA-3502-01A	Primary Solid Tumor	colon adenocarcinoma	0.9662	19.4678	0.5331		TCGA-AA-3502-01A	Primary Solid Tumor	colon adenocarcinoma	4080.68	607.246	7485.02	1097.1	87.9227	2734.78	329.469	2254.59	4934.3	4682.13	824.155	1778.26	2437.68		TCGA-A6-6650	N0	Colorectal Cancer	Colon Adenocarcinoma	-0.4967		TCGA-CM-6679-01A	122	0				TCGA-A6-6137-01A	348	0
	TCGA_A6_5665	0.8358		TCGA-A6-6654-01A	47.2585	253.82		TCGA-AA-3506-01A	Primary Solid Tumor	colon adenocarcinoma	15.2826	0	0.894695		TCGA-AA-3506-01A	Primary Solid Tumor	colon adenocarcinoma	3537.48	9116.98	5805.6	43176.1	271.042	6491.52	734.015	20238.2	6047.42	4200.92	514.215	2597.15	6559.82		TCGA-A6-6651	N1b	Colorectal Cancer	Colon Adenocarcinoma	2.0449		TCGA-A6-5657-01A	367	0				TCGA-F4-6809-01A	403	1
	TCGA_A6_5665_Norm	0.976		TCGA-A6-6782-01A	46.7372	316.192		TCGA-AA-3509-01A	Primary Solid Tumor	colon adenocarcinoma	9.9697	0	1.01315		TCGA-AA-3509-01A	Primary Solid Tumor	colon adenocarcinoma	3879.07	8216.75	13486.4	20888.2	252.71	5984.41	517.99	15407.9	7661.05	9396.21	736.022	6138.72	4962.64		TCGA-A6-6652	N0	Colorectal Cancer	Colon Adenocarcinoma	-0.791		TCGA-AA-3662-01A	184	0				TCGA-F4-6570-01A	188	1
	TCGA_A6_5667	0.8136		TCGA-A6-A567-01A	4.1376	0.0833		TCGA-AA-3511-01A	Primary Solid Tumor	colon adenocarcinoma	19.2082	0	1.21395		TCGA-AA-3511-01A	Primary Solid Tumor	colon adenocarcinoma	5662.15	14458.6	9106.39	89919.1	474.229	5832.46	715.825	28922.4	5241.7	5773.98	1089.74	5024.01	6819.54		TCGA-A6-6653	N0	Colorectal Cancer	Colon Adenocarcinoma	-0.0243		TCGA-D5-6924-01A	435	0				TCGA-NH-A6GB-01A	476	0
	TCGA_A6_5667_Norm	0.9732		TCGA-A6-A56B-01A	19.025	480.905		TCGA-AA-3526-01A	Primary Solid Tumor	colon adenocarcinoma	13.2845	111.893	1.05757		TCGA-AA-3526-01A	Primary Solid Tumor	colon adenocarcinoma	6424.19	4989.46	9235.91	38661	207.513	8489.24	403.115	25396.7	6331.65	14266.6	659.643	3557.03	6160.11		TCGA-A6-6654	N1	Colorectal Cancer	Colon Adenocarcinoma	2.0103		TCGA-AZ-6601-01A	1825	0				TCGA-CM-5860-01A	304	0
	TCGA_A6_6137	0.8724		TCGA-A6-A5ZU-01A	10.6988	0		TCGA-AA-3655-01A	Primary Solid Tumor	colon adenocarcinoma	10.663	103.388	0.851532		TCGA-AA-3655-01A	Primary Solid Tumor	colon adenocarcinoma	4164.12	7212.8	5632.82	60677.3	204.451	2860.45	531.757	18446.9	5936.49	9313.4	909.133	2019.94	5812.57		TCGA-A6-6782	N0	Colorectal Cancer	Colon Adenocarcinoma	1.9732		TCGA-A6-2685-01A	464	0				TCGA-G4-6297-01A	1825	0
	TCGA_A6_6138	0.7591		TCGA-AA-3489-01A	41.7299	143.39		TCGA-AA-3660-01A	Primary Solid Tumor	colon adenocarcinoma	12.5604	138.957	0.904211		TCGA-AA-3660-01A	Primary Solid Tumor	colon adenocarcinoma	4784.54	4447.83	8887.44	37115.9	166.667	3857.97	630.918	17841.5	4794.2	12778.7	1002.42	2898.07	4858.45		TCGA-A6-A567	N1	Colorectal Cancer	Colon Adenocarcinoma	-1.0587		TCGA-CM-6677-01A	153	0				TCGA-G4-6295-01A	254	0
	TCGA_A6_6140	0.6667		TCGA-AA-3492-01A	10.7502	0		TCGA-AA-3662-01A	Primary Solid Tumor	colon adenocarcinoma	25.8228	101.737	0.9319		TCGA-AA-3662-01A	Primary Solid Tumor	colon adenocarcinoma	3632.91	9290.13	12503.3	40417.2	257.215	5881.01	790.38	16715.9	6548.35	2527.59	573.165	4477.47	5484.68		TCGA-A6-A56B	N1	Colorectal Cancer	Colon Adenocarcinoma	0.0009		TCGA-G4-6625-01A	1825	0				TCGA-G4-6628-01A	1595	0
	TCGA_A6_6141	0.8533		TCGA-AA-3495-01A	9.1347	0		TCGA-AA-3663-01A	Primary Solid Tumor	colon adenocarcinoma	7.1429	8.1917	0.742728		TCGA-AA-3663-01A	Primary Solid Tumor	colon adenocarcinoma	5681.87	5925.82	6256.59	8734.62	161.538	6159.89	419.231	11385.2	6430.22	374.725	563.187	3441.76	3988.46		TCGA-A6-A5ZU	N1	Colorectal Cancer	Colon Adenocarcinoma	-0.5917		TCGA-SS-A7HO-01A	1825	0				TCGA-DM-A0X9-01A	1825	0
	TCGA_A6_6142	0.9106		TCGA-AA-3496-01A	28.15	147.526		TCGA-AA-3675-01A	Primary Solid Tumor	colon adenocarcinoma	7.6428	0	0.820732		TCGA-AA-3675-01A	Primary Solid Tumor	colon adenocarcinoma	4530.17	4448.11	4897.43	31677	256.637	5124.7	644.811	19223.7	4776.75	10250.2	750.201	2250.6	4430.33		TCGA-AA-3488	N2	Colorectal Cancer	Colon Adenocarcinoma	NA		TCGA-CA-6716-01A	371	0				TCGA-AZ-6605-01A	159	1
	TCGA_A6_6648	0.7724		TCGA-AA-3502-01A	0.9662	19.4678		TCGA-AA-3685-01A	Primary Solid Tumor	colon adenocarcinoma	8.7041	130.723	1.15216		TCGA-AA-3685-01A	Primary Solid Tumor	colon adenocarcinoma	4881.53	3498.07	13109.3	11992.3	172.147	18914.4	473.888	16946.3	7257.25	14561.9	526.596	5454.55	6171.37		TCGA-AA-3489	N0	Colorectal Cancer	Colon Adenocarcinoma	1.6168		TCGA-AD-A5EK-01A	500	0				TCGA-AA-A01P-01A	1158	1
	TCGA_A6_6649	0.9805		TCGA-AA-3506-01A	15.2826	0		TCGA-AA-3697-01A	Primary Solid Tumor	colon adenocarcinoma	3.096	0.0472	0.87591		TCGA-AA-3697-01A	Primary Solid Tumor	colon adenocarcinoma	5026.01	7846.44	12115.2	15518.9	190.712	4180.81	556.656	10319.5	6574.61	8736.84	648.297	4400	5154.18		TCGA-AA-3492	N0	Colorectal Cancer	Colon Adenocarcinoma	-0.588		TCGA-AZ-6603-01A	899	1				TCGA-CM-4743-01A	184	0
	TCGA_A6_6650	0.6452		TCGA-AA-3509-01A	9.9697	0		TCGA-AA-3712-01A	Primary Solid Tumor	colon adenocarcinoma	24.8761	180.756	1.09507		TCGA-AA-3712-01A	Primary Solid Tumor	colon adenocarcinoma	3855.38	16521.1	7423.21	136218	227.258	4543.9	478.971	29545.7	4907.35	6641.93	976.072	1864.87	8094.1		TCGA-AA-3494	N0	Colorectal Cancer	Colon Adenocarcinoma	NA		TCGA-CM-4743-01A	184	0				TCGA-AA-3496-01A	31	0
	TCGA_A6_6651	0.9357		TCGA-AA-3511-01A	19.2082	0		TCGA-AA-3713-01A	Primary Solid Tumor	colon adenocarcinoma	10.0377	71.8882	0.617075		TCGA-AA-3713-01A	Primary Solid Tumor	colon adenocarcinoma	3560.31	6039.63	5120.02	22113.9	153.655	2148.08	576.784	7531.78	4869.08	797.614	1173.26	1489.45	4609.82		TCGA-AA-3495	N0	Colorectal Cancer	Colon Adenocarcinoma	-0.703		TCGA-NH-A5IV-01A	588	0				TCGA-DM-A0XF-01A	1162	1
	TCGA_A6_6652	0.9252		TCGA-AA-3526-01A	13.2845	111.893		TCGA-AA-A01P-01A	Primary Solid Tumor	colon adenocarcinoma	47.836	149.876	1.27991		TCGA-AA-A01P-01A	Primary Solid Tumor	colon adenocarcinoma	5991.34	11231	7911.62	135989	319.362	6076.08	731.207	38896.1	5310.71	7426.42	892.027	2863.33	12237.1		TCGA-AA-3496	N0	Colorectal Cancer	Colon Adenocarcinoma	0.6503		TCGA-AD-6548-01A	650	0				TCGA-D5-6541-01A	474	0
	TCGA_A6_6653	0.8533		TCGA-AA-3655-01A	10.663	103.388		TCGA-AA-A01X-01A	Primary Solid Tumor	colon adenocarcinoma	8.4112	0	0.717655		TCGA-AA-A01X-01A	Primary Solid Tumor	colon adenocarcinoma	4062.15	3408.88	4441.59	18639.3	219.626	2252.34	733.645	8304.21	6605.61	7838.78	1102.8	1788.79	3381.03		TCGA-AA-3502	N0	Colorectal Cancer	Colon Adenocarcinoma	-1.2844		TCGA-G4-6627-01A	1434	0				TCGA-AD-6964-01A	331	1
	TCGA_A6_6654	0.8631		TCGA-AA-3660-01A	12.5604	138.957		TCGA-AA-A01Z-01A	Primary Solid Tumor	colon adenocarcinoma	12.4464	26.1067	0.663472		TCGA-AA-A01Z-01A	Primary Solid Tumor	colon adenocarcinoma	3238.63	4330.04	6324.89	23509	160.515	1663.09	342.489	8034.76	4362.23	12451.9	922.318	2236.48	2630.37		TCGA-AA-3506	N0	Colorectal Cancer	Colon Adenocarcinoma	-0.2655		TCGA-AU-6004-01A	824	0				TCGA-D5-6532-01A	555	0
	TCGA_A6_6780	0.8136		TCGA-AA-3662-01A	25.8228	101.737		TCGA-AA-A02K-01A	Primary Solid Tumor	colon adenocarcinoma	12.3265	75.1242	0.738743		TCGA-AA-A02K-01A	Primary Solid Tumor	colon adenocarcinoma	3386.99	3247.82	14237.1	13813.2	147.52	1819.54	358.263	5530.6	6011.73	8923.16	797.244	5917.1	2687.01		TCGA-AA-3509	N0	Colorectal Cancer	Colon Adenocarcinoma	-0.6436		TCGA-CM-6168-01A	181	0				TCGA-CM-6167-01A	122	0
	TCGA_A6_6781	0.8649		TCGA-AA-3663-01A	7.1429	8.1917		TCGA-AA-A02Y-01A	Primary Solid Tumor	colon adenocarcinoma	3.003	0	0.52649		TCGA-AA-A02Y-01A	Primary Solid Tumor	colon adenocarcinoma	3397.68	541.399	6891.46	1205.49	14.157	615.616	326.469	959.674	4639.21	12898.3	484.771	3537.11	889.318		TCGA-AA-3510	N0	Colorectal Cancer	Colon Adenocarcinoma	NA		TCGA-G4-6297-01A	1825	0				TCGA-AA-3489-01A	214	1
	TCGA_A6_6782	0.7442		TCGA-AA-3675-01A	7.6428	0		TCGA-AD-6548-01A	Primary Solid Tumor	colon adenocarcinoma	23.6952	165.13	1.00697		TCGA-AD-6548-01A	Primary Solid Tumor	colon adenocarcinoma	4022.88	8666.33	9031.56	84345.6	230.007	2764.99	649.985	21103.5	6423.86	12252.1	686.753	3743.85	8530.53		TCGA-AA-3511	N0	Colorectal Cancer	Colon Adenocarcinoma	0.0139		TCGA-CM-6164-01A	487	0				TCGA-F4-6854-01A	16	0
	TCGA_A6_A565	0.7724		TCGA-AA-3685-01A	8.7041	130.723		TCGA-AD-6888-01A	Primary Solid Tumor	colon adenocarcinoma	2.5993	0	0.59849		TCGA-AD-6888-01A	Primary Solid Tumor	colon adenocarcinoma	6563.68	1409.58	4790.94	3704.05	95.4326	624.582	424.805	1767.92	6585.22	13156.7	572.224	3039.73	919.421		TCGA-AA-3514	N0	Colorectal Cancer	Colon Adenocarcinoma	NA		TCGA-F4-6459-01A	262		1			TCGA-AZ-6603-01A	899		1
	TCGA_A6_A566	0.9379		TCGA-AA-3697-01A	3.096	0.0472		TCGA-AD-6889-01A	Primary Solid Tumor	colon adenocarcinoma	5.6324	46.0359	0.801802		TCGA-AD-6889-01A	Primary Solid Tumor	colon adenocarcinoma	4828.98	4721.45	7795.19	25774.2	154.122	1954.94	359.959	9696.88	6113.16	12916	760.369	3457.76	4305.49		TCGA-AA-3517	N0	Colorectal Cancer	Colon Adenocarcinoma	NA		TCGA-A6-2684-01A	387		0			TCGA-A6-2685-01A	464		0
	TCGA_A6_A56B	0.8358		TCGA-AA-3712-01A	24.8761	180.756		TCGA-AD-6890-01A	Primary Solid Tumor	colon adenocarcinoma	21.2766	0	0.881671		TCGA-AD-6890-01A	Primary Solid Tumor	colon adenocarcinoma	3115.25	7241.73	9212.77	56512.4	370.567	3310.87	333.924	13735.2	5025.41	13339.8	585.106	3515.37	5348.88		TCGA-AA-3518	N0	Colorectal Cancer	Colon Adenocarcinoma	NA		TCGA-AZ-4616-01A	156		1			TCGA-D5-6898-01A	229		0
	TCGA_A6_A5ZU	1		TCGA-AA-3713-01A	10.0377	71.8882		TCGA-AD-6895-01A	Primary Solid Tumor	colon adenocarcinoma	17.9467	264.325	1.04288		TCGA-AD-6895-01A	Primary Solid Tumor	colon adenocarcinoma	9545.28	7855.45	5147.39	91183.8	387.743	3664.43	518.565	21070.8	5962.55	5913.43	688.586	3739.52	8042.48		TCGA-AA-3519	N1	Colorectal Cancer	Colon Adenocarcinoma	NA		TCGA-CA-5797-01A	100		0			TCGA-3L-AA1B-01A	349		0
	TCGA_AA_3489	0.9185		TCGA-AA-A01P-01A	47.836	149.876		TCGA-AD-6901-01A	Primary Solid Tumor	colon adenocarcinoma	38.4632	97.5227	1.43603		TCGA-AD-6901-01A	Primary Solid Tumor	colon adenocarcinoma	11997.3	8670.54	10954.6	171155	317.716	5851.67	803.511	43661	5924.91	2965.88	937.869	4316.3	16305.3		TCGA-AA-3520	N0	Colorectal Cancer	Colon Adenocarcinoma	NA		TCGA-AD-6890-01A	746		0			TCGA-AA-3660-01A	1825		0
	TCGA_AA_3492	0.9106		TCGA-AA-A01X-01A	8.4112	0		TCGA-AD-6963-01A	Primary Solid Tumor	colon adenocarcinoma	12.987	97.519	0.787386		TCGA-AD-6963-01A	Primary Solid Tumor	colon adenocarcinoma	3462.97	4822.74	13213.1	17477.4	60.0211	1833.63	448.578	6076.52	6255.53	16660.9	566.515	5168.48	3840.76		TCGA-AA-3521	N0	Colorectal Cancer	Colon Adenocarcinoma	NA		TCGA-5M-AAT4-01A	49		1			TCGA-DM-A282-01A	1825		0
	TCGA_AA_3495	0.9106		TCGA-AA-A01Z-01A	12.4464	26.1067		TCGA-AD-6964-01A	Primary Solid Tumor	colon adenocarcinoma	30.9296	144.907	1.41771		TCGA-AD-6964-01A	Primary Solid Tumor	colon adenocarcinoma	4759.13	11480.9	5685	167444	866.702	7077.5	913.769	43261.1	4632.05	5641.29	651.539	2412.51	15088.9		TCGA-AA-3522	N0	Colorectal Cancer	Colon Adenocarcinoma	NA		TCGA-G4-6315-01A	1117		0			TCGA-F4-6805-01A	496		0
	TCGA_AA_3496	0.8136		TCGA-AA-A02K-01A	12.3265	75.1242		TCGA-AD-6965-01A	Primary Solid Tumor	colon adenocarcinoma	11.3636	242.321	0.848455		TCGA-AD-6965-01A	Primary Solid Tumor	colon adenocarcinoma	3128.1	7209.19	13543.9	27007.2	254.132	3165.81	475.723	11946.8	6302.17	7770.14	765.496	3488.64	5463.33		TCGA-AA-3524	N0	Colorectal Cancer	Colon Adenocarcinoma	NA		TCGA-3L-AA1B-01A	349		0			TCGA-A6-5664-01A	362		0
	TCGA_AA_3496_Norm	1		TCGA-AA-A02Y-01A	3.003	0		TCGA-AD-A5EJ-01A	Primary Solid Tumor	colon adenocarcinoma	19.4932	118.366	0.893538		TCGA-AD-A5EJ-01A	Primary Solid Tumor	colon adenocarcinoma	9287.04	5542.4	7927.39	60030.2	159.357	1992.69	414.23	14828	4909.84	11168.1	787.037	2535.57	5001.26		TCGA-AA-3525	N1	Colorectal Cancer	Colon Adenocarcinoma	NA		TCGA-A6-5664-01A	362		0			TCGA-DM-A1D0-01A	1825		0
	TCGA_AA_3506	0.8358		TCGA-AD-6548-01A	23.6952	165.13		TCGA-AD-A5EK-01A	Primary Solid Tumor	colon adenocarcinoma	24.5211	0	0.799153		TCGA-AD-A5EK-01A	Primary Solid Tumor	colon adenocarcinoma	2644.83	8096.17	9645.98	29184.3	260.536	2984.29	609.578	12564.4	3773.56	10188.9	860.919	2529.5	3914.18		TCGA-AA-3526	N0	Colorectal Cancer	Colon Adenocarcinoma	-0.4077		TCGA-CM-5861-01A	335		0			TCGA-CM-5348-01A	393		0
	TCGA_AA_3509	0.7843		TCGA-AD-6888-01A	2.5993	0		TCGA-AM-5820-01A	Primary Solid Tumor	colon adenocarcinoma	18.3716	121.555	1.19879		TCGA-AM-5820-01A	Primary Solid Tumor	colon adenocarcinoma	5782.05	12000.8	6014.2	31889.8	631.733	6731.94	572.025	21968.3	7053.44	21137.4	718.58	2870.15	5827.97		TCGA-AA-3527	N0	Colorectal Cancer	Colon Adenocarcinoma	NA		TCGA-CM-6680-01A	91		0			TCGA-AA-3685-01A	1127		0
	TCGA_AA_3511	0.9575		TCGA-AD-6889-01A	5.6324	46.0359		TCGA-AM-5821-01A	Primary Solid Tumor	colon adenocarcinoma	8.431	79.6245	1.31315		TCGA-AM-5821-01A	Primary Solid Tumor	colon adenocarcinoma	7958.9	5994.99	10666.3	61197.2	475.3	3813.46	621.789	33313.7	8992.23	25528.7	500.593	4514.29	7252.51		TCGA-AA-3529	N2	Colorectal Cancer	Colon Adenocarcinoma	NA		TCGA-A6-2675-01A	846		0			TCGA-D5-5538-01A	373		0
	TCGA_AA_3511_Norm	0.8907		TCGA-AD-6890-01A	21.2766	0		TCGA-AU-3779-01A	Primary Solid Tumor	colon adenocarcinoma	14.0735	10.0568	1.01764		TCGA-AU-3779-01A	Primary Solid Tumor	colon adenocarcinoma	4998.18	7135.26	7209.8	36185	290.852	7643.47	376.336	19448	6675.01	8537.92	1049.26	4923.12	7757.1		TCGA-AA-3530	N0	Colorectal Cancer	Colon Adenocarcinoma	NA		TCGA-D5-6531-01A	540		0			TCGA-G4-6311-01A	1199		0
	TCGA_AA_3514	0.6194		TCGA-AD-6895-01A	17.9467	264.325		TCGA-AU-6004-01A	Primary Solid Tumor	colon adenocarcinoma	23.6143	0	0.93226		TCGA-AU-6004-01A	Primary Solid Tumor	colon adenocarcinoma	4567.62	8769.21	6033.89	102882	239.641	3059.8	539.193	19106.6	5124.3	9238.88	831.748	2035.64	8467.86		TCGA-AA-3531	N0	Colorectal Cancer	Colon Adenocarcinoma	NA		TCGA-CA-6715-01A	383		0			TCGA-AY-6386-01A	360		0
	TCGA_AA_3514_Norm	0.9252		TCGA-AD-6901-01A	38.4632	97.5227		TCGA-AY-5543-01A	Primary Solid Tumor	colon adenocarcinoma	6.3091	62.4262	0.796009		TCGA-AY-5543-01A	Primary Solid Tumor	colon adenocarcinoma	4659.7	3768.14	10878.5	6217.67	145.899	2553.23	492.508	5255.91	6941.25	8344.24	823.738	6124.21	2830.33		TCGA-AA-3532	N0	Colorectal Cancer	Colon Adenocarcinoma	NA		TCGA-A6-6137-01A	348		0			TCGA-AZ-6598-01A	1503		1
	TCGA_AA_3516_Norm	0.9772		TCGA-AD-6963-01A	12.987	97.519		TCGA-AY-6197-01A	Primary Solid Tumor	colon adenocarcinoma	9.4031	0	0.711		TCGA-AY-6197-01A	Primary Solid Tumor	colon adenocarcinoma	4137.37	11296.4	7241.21	21787.4	165.577	1715.05	434.587	7640.23	4095.26	9466.07	845.871	2605.07	3827.88		TCGA-AA-3534	N0	Colorectal Cancer	Colon Adenocarcinoma	NA		TCGA-NH-A50V-01A	588		0			TCGA-CM-5864-01A	61		0
	TCGA_AA_3517_Norm	0.916		TCGA-AD-6964-01A	30.9296	144.907		TCGA-AY-6386-01A	Primary Solid Tumor	colon adenocarcinoma	10.2416	128.419	0.715102		TCGA-AY-6386-01A	Primary Solid Tumor	colon adenocarcinoma	6578.65	5080.71	4769.9	19491	203.495	1998	395.414	7386.4	5544.7	9719.69	616.721	2307.91	4971.61		TCGA-AA-3538	N0	Colorectal Cancer	Colon Adenocarcinoma	NA		TCGA-AA-3511-01A	212		0			TCGA-NH-A50V-01A	588		0
	TCGA_AA_3518_Norm	0.9889		TCGA-AD-6965-01A	11.3636	242.321		TCGA-AY-A54L-01A	Primary Solid Tumor	colon adenocarcinoma	2.1204	58.3705	0.636083		TCGA-AY-A54L-01A	Primary Solid Tumor	colon adenocarcinoma	4608.57	1656.91	13049.6	1750.64	89.4826	1040.29	276.505	2836.73	4979.22	1737.07	863.444	7130.2	1133.05		TCGA-AA-3542	N2	Colorectal Cancer	Colon Adenocarcinoma	NA		TCGA-CM-6166-01A	424		0			TCGA-G4-6323-01A	419		0
	TCGA_AA_3520_Norm	0.932		TCGA-AD-A5EJ-01A	19.4932	118.366		TCGA-AY-A69D-01A	Primary Solid Tumor	colon adenocarcinoma	8.8786	83.8726	0.900531		TCGA-AY-A69D-01A	Primary Solid Tumor	colon adenocarcinoma	4266.36	7296.46	8220.55	32374.7	191.778	2349.64	297.612	9906.42	6790.73	14915.4	1392.88	2022.55	3859.36		TCGA-AA-3544	N0	Colorectal Cancer	Colon Adenocarcinoma	NA		TCGA-NH-A6GB-01A	476		0			TCGA-A6-2684-01A	387		0
	TCGA_AA_3522_Norm	0.9485		TCGA-AD-A5EK-01A	24.5211	0		TCGA-AY-A71X-01A	Primary Solid Tumor	colon adenocarcinoma	4.2275	0	0.479727		TCGA-AY-A71X-01A	Primary Solid Tumor	colon adenocarcinoma	6314.76	1110.3	6107.99	2601.46	36.1261	825.135	277.863	1557.65	4391.24	2406.99	1003.46	1756.34	1050.09		TCGA-AA-3548	N2	Colorectal Cancer	Colon Adenocarcinoma	NA		TCGA-G4-6299-01A	1825		0			TCGA-QG-A5Z1-01A	256		1
	TCGA_AA_3525_Norm	1		TCGA-AM-5820-01A	18.3716	121.555		TCGA-AY-A8YK-01A	Primary Solid Tumor	colon adenocarcinoma	16.2536	36.1463	0.768711		TCGA-AY-A8YK-01A	Primary Solid Tumor	colon adenocarcinoma	6137.81	7994.89	8747.2	17492.1	188.077	2572.24	463.923	7781.27	5234.11	7446.91	765.31	4050.39	3458.76		TCGA-AA-3549	N0	Colorectal Cancer	Colon Adenocarcinoma	NA		TCGA-NH-A8F8-01A	511		1			TCGA-G4-6625-01A	1825		0
	TCGA_AA_3526	0.7591		TCGA-AM-5821-01A	8.431	79.6245		TCGA-AZ-4313-01A	Primary Solid Tumor	colon adenocarcinoma	8.9835	83.3563	0.925885		TCGA-AZ-4313-01A	Primary Solid Tumor	colon adenocarcinoma	5195.74	4883.69	13227.9	24278	109.22	3658.16	252.955	14558.4	5510.17	7995.74	473.286	5850.12	4513.48		TCGA-AA-3552	N2	Colorectal Cancer	Colon Adenocarcinoma	NA		TCGA-A6-A56B-01A	1711		1			TCGA-CM-6675-01A	153		0
	TCGA_AA_3527_Norm	0.9857		TCGA-AU-3779-01A	14.0735	10.0568		TCGA-AZ-4315-01A	Primary Solid Tumor	colon adenocarcinoma	7.9549	16.6748	0.992384		TCGA-AZ-4315-01A	Primary Solid Tumor	colon adenocarcinoma	4902.44	4564.8	10720.6	33513.6	208.596	6971.16	407.027	22847.4	6978.68	5702.35	625.345	5223.29	5171.01		TCGA-AA-3553	N0	Colorectal Cancer	Colon Adenocarcinoma	NA		TCGA-AZ-5403-01A	1825		0			TCGA-AM-5820-01A	14		0
	TCGA_AA_3529	1		TCGA-AU-6004-01A	23.6143	0		TCGA-AZ-4323-01A	Primary Solid Tumor	colon adenocarcinoma	89.8256	172.72	1.46331		TCGA-AZ-4323-01A	Primary Solid Tumor	colon adenocarcinoma	4744.7	11360.2	9815.58	57252	1232.47	5927.99	1015.18	24759.8	6994.86	7142.89	922.343	2985.82	19294		TCGA-AA-3554	N0	Colorectal Cancer	Colon Adenocarcinoma	NA		TCGA-CM-5862-01A	153		1			TCGA-A6-6140-01A	356		0
	TCGA_AA_3531_Norm	0.9357		TCGA-AY-5543-01A	6.3091	62.4262		TCGA-AZ-4614-01A	Primary Solid Tumor	colon adenocarcinoma	10.6209	71.6033	0.754004		TCGA-AZ-4614-01A	Primary Solid Tumor	colon adenocarcinoma	3314.54	4402.37	8602.94	12265.1	165.441	1851.31	305.556	5530.23	5516.75	11778.2	1017.97	2761.85	2610.29		TCGA-AA-3558	N0	Colorectal Cancer	Colon Adenocarcinoma	NA		TCGA-A6-6653-01A	282		0			TCGA-DM-A28F-01A	1094		1
	TCGA_AA_3532	0.8506		TCGA-AY-6197-01A	9.4031	0		TCGA-AZ-4615-01A	Primary Solid Tumor	colon adenocarcinoma	3.7687	0	0.906607		TCGA-AZ-4615-01A	Primary Solid Tumor	colon adenocarcinoma	6114.71	4682.13	7520.43	53917.3	156.872	5054.76	385.82	25764.2	5193.73	575.197	860.205	2569.78	11801.2		TCGA-AA-3560	N2	Colorectal Cancer	Colon Adenocarcinoma	NA		TCGA-AM-5820-01A	14		0			TCGA-CM-6676-01A	153		0
	TCGA_AA_3534_Norm	0.9632		TCGA-AY-6386-01A	10.2416	128.419		TCGA-AZ-4616-01A	Primary Solid Tumor	colon adenocarcinoma	21.9233	70.5555	1.08918		TCGA-AZ-4616-01A	Primary Solid Tumor	colon adenocarcinoma	5497.76	7307.42	13336.8	41531.6	381.166	5488.79	337.319	14713.5	6686.6	17925.3	664.674	3963.13	6980.44		TCGA-AA-3561	N0	Colorectal Cancer	Colon Adenocarcinoma	NA		TCGA-D5-5537-01A	1381		1			TCGA-D5-6931-01A	365		0
	TCGA_AA_3543	1		TCGA-AY-A54L-01A	2.1204	58.3705		TCGA-AZ-4682-01B	Primary Solid Tumor	colon adenocarcinoma	7.7813	35.699	0.958619		TCGA-AZ-4682-01B	Primary Solid Tumor	colon adenocarcinoma	5909.7	4589.33	16500.5	7982.8	226.887	6367.15	513.157	11492.6	5680.35	10269.3	493.908	6005.12	3539.42		TCGA-AA-3562	N2	Colorectal Cancer	Colon Adenocarcinoma	NA		TCGA-D5-6539-01A	380		0			TCGA-F4-6703-01A	1091		0
	TCGA_AA_3552	0.9193		TCGA-AY-A69D-01A	8.8786	83.8726		TCGA-AZ-4684-01A	Primary Solid Tumor	colon adenocarcinoma	16.6212	0	1.1528		TCGA-AZ-4684-01A	Primary Solid Tumor	colon adenocarcinoma	7899.32	8172.39	10781	63393.6	333.848	5131.19	812.537	30894	6451.86	6538.76	761.724	3401.64	8859.78		TCGA-AA-3655	N0	Colorectal Cancer	Colon Adenocarcinoma	-0.5943		TCGA-D5-6920-01A	377		0			TCGA-DM-A1D9-01A	1825		0
	TCGA_AA_3655	0.929		TCGA-AY-A71X-01A	4.2275	0		TCGA-AZ-5403-01A	Primary Solid Tumor	colon adenocarcinoma	18.9727	39.2566	1.47568		TCGA-AZ-5403-01A	Primary Solid Tumor	colon adenocarcinoma	11025.5	7472.47	15514.6	37149.9	328.552	15866.3	589.079	43516.4	7855.62	8026.38	640.907	4945.86	11147.7		TCGA-AA-3660	N0	Colorectal Cancer	Colon Adenocarcinoma	-0.4592		TCGA-D5-6898-01A	229		0			TCGA-AA-3526-01A	580		0
	TCGA_AA_3655_Norm	0.8675		TCGA-AY-A8YK-01A	16.2536	36.1463		TCGA-AZ-5407-01A	Primary Solid Tumor	colon adenocarcinoma	5.81	11.5239	0.608283		TCGA-AZ-5407-01A	Primary Solid Tumor	colon adenocarcinoma	4954.22	3058.4	8555.86	3326.83	172.558	3075.83	292.826	4745.06	4934.46	5732.76	719.863	2244.42	3421.65		TCGA-AA-3662	N2	Colorectal Cancer	Colon Adenocarcinoma	0.4847		TCGA-CM-5348-01A	393		0			TCGA-G4-6320-01A	804		0
	TCGA_AA_3660	0.8406		TCGA-AZ-4313-01A	8.9835	83.3563		TCGA-AZ-6598-01A	Primary Solid Tumor	colon adenocarcinoma	14.5788	128.077	0.769872		TCGA-AZ-6598-01A	Primary Solid Tumor	colon adenocarcinoma	2440.6	6110.69	11504.9	56638.2	132.829	1767.28	555.616	14643.1	3602.59	679.266	637.149	3241.9	5658.52		TCGA-AA-3663	N0	Colorectal Cancer	Colon Adenocarcinoma	-0.8448		TCGA-G4-6293-01A	1825		0			TCGA-D5-6922-01A	308		0
	TCGA_AA_3660_Norm	0.8608		TCGA-AZ-4315-01A	7.9549	16.6748		TCGA-AZ-6599-01A	Primary Solid Tumor	colon adenocarcinoma	8.1518	0	0.504112		TCGA-AZ-6599-01A	Primary Solid Tumor	colon adenocarcinoma	2884.73	581.327	6275.89	888.04	171.188	755.063	520.698	847.79	3593.94	5367.98	1061.27	1255.89	1162.63		TCGA-AA-3664	N0	Colorectal Cancer	Colon Adenocarcinoma	NA		TCGA-CM-6676-01A	153		0			TCGA-D5-6530-01A	621		0
	TCGA_AA_3662	0.7843		TCGA-AZ-4323-01A	89.8256	172.72		TCGA-AZ-6600-01A	Primary Solid Tumor	colon adenocarcinoma	29.6988	225.944	1.29459		TCGA-AZ-6600-01A	Primary Solid Tumor	colon adenocarcinoma	4717.44	17292.3	7959.27	119751	600.339	6496.82	680.95	34204.9	5998.3	3618.16	708.104	2832.41	14398.3		TCGA-AA-3666	N1	Colorectal Cancer	Colon Adenocarcinoma	NA		TCGA-CA-6718-01A	306		1			TCGA-A6-2686-01A	488		0
	TCGA_AA_3662_Norm	0.96		TCGA-AZ-4614-01A	10.6209	71.6033		TCGA-AZ-6601-01A	Primary Solid Tumor	colon adenocarcinoma	25.7384	16.5907	0.939057		TCGA-AZ-6601-01A	Primary Solid Tumor	colon adenocarcinoma	2598.31	9024.05	6362.45	67340.1	239.24	3928.69	576.371	17038	4845.15	8883.12	825.317	2078.06	15543.6		TCGA-AA-3667	N0	Colorectal Cancer	Colon Adenocarcinoma	NA		TCGA-AD-6895-01A	763		0			TCGA-CM-5349-01A	335		0
	TCGA_AA_3663	1		TCGA-AZ-4615-01A	3.7687	0		TCGA-AZ-6603-01A	Primary Solid Tumor	colon adenocarcinoma	24.4995	141.743	1.12316		TCGA-AZ-6603-01A	Primary Solid Tumor	colon adenocarcinoma	6160.34	12489.6	8698.05	56027.8	426.364	6444.1	868.452	23681.1	4806.66	5652.07	1174.15	3116.56	7459.69		TCGA-AA-3672	N1	Colorectal Cancer	Colon Adenocarcinoma	NA		TCGA-A6-4105-01A	442		1			TCGA-CK-6747-01A	1825		0
	TCGA_AA_3663_Norm	0.9106		TCGA-AZ-4616-01A	21.9233	70.5555		TCGA-AZ-6605-01A	Primary Solid Tumor	colon adenocarcinoma	41.8307	150.57	1.8898		TCGA-AZ-6605-01A	Primary Solid Tumor	colon adenocarcinoma	7298.72	20056.1	10410.4	197575	740.65	13320.9	1150.59	59909.4	6621.06	7800.69	842.52	3605.32	18967.6		TCGA-AA-3673	N0	Colorectal Cancer	Colon Adenocarcinoma	NA		TCGA-D5-6541-01A	474		0			TCGA-G4-6627-01A	1434		0
	TCGA_AA_3675	0.9252		TCGA-AZ-4682-01B	7.7813	35.699		TCGA-AZ-6606-01A	Primary Solid Tumor	colon adenocarcinoma	11.6436	0	0.791692		TCGA-AZ-6606-01A	Primary Solid Tumor	colon adenocarcinoma	4922.76	7434.45	13999	10386.9	205.011	2109.57	287.348	5997.71	6743.74	7179.54	553.072	6403.99	2738.73		TCGA-AA-3675	N0	Colorectal Cancer	Colon Adenocarcinoma	-0.8092		TCGA-G4-6303-01A	1825		0			TCGA-D5-5541-01A	350		0
	TCGA_AA_3684	0.3371		TCGA-AZ-4684-01A	16.6212	0		TCGA-AZ-6607-01A	Primary Solid Tumor	colon adenocarcinoma	11.3672	164.929	2.38318		TCGA-AZ-6607-01A	Primary Solid Tumor	colon adenocarcinoma	19208.8	13366.7	4101.77	468848	501.354	9143.43	867.499	131048	7337.24	1684.74	918.95	1163.05	25390.6		TCGA-AA-3678	N1	Colorectal Cancer	Colon Adenocarcinoma	NA		TCGA-CM-4747-01A	244		0			TCGA-D5-6538-01A	521		0
	TCGA_AA_3695	1		TCGA-AZ-5403-01A	18.9727	39.2566		TCGA-AZ-6608-01A	Primary Solid Tumor	colon adenocarcinoma	8.5714	41.6481	0.709071		TCGA-AZ-6608-01A	Primary Solid Tumor	colon adenocarcinoma	3872.65	3028.57	15206.5	3963.67	115.102	1020.82	329.388	2792.24	4356.33	11329	958.775	3583.27	1177.55		TCGA-AA-3679	N2	Colorectal Cancer	Colon Adenocarcinoma	NA		TCGA-CM-5860-01A	304		0			TCGA-AA-3655-01A	1825		0
	TCGA_AA_3697_Norm	0.8232		TCGA-AZ-5407-01A	5.81	11.5239		TCGA-CA-5254-01A	Primary Solid Tumor	colon adenocarcinoma	10.2282	0.0045	0.953562		TCGA-CA-5254-01A	Primary Solid Tumor	colon adenocarcinoma	3250.31	4620.13	7734.82	61665.3	167.44	4691.35	595.511	25626.3	5526.66	12656.1	1103.13	2135.43	5168.29		TCGA-AA-3680	N2	Colorectal Cancer	Colon Adenocarcinoma	NA		TCGA-A6-2682-01A	424		1			TCGA-AA-3662-01A	184		0
	TCGA_AA_3712	0.807		TCGA-AZ-6598-01A	14.5788	128.077		TCGA-CA-5255-01A	Primary Solid Tumor	colon adenocarcinoma	2.7747	0	0.679668		TCGA-CA-5255-01A	Primary Solid Tumor	colon adenocarcinoma	6629.86	1998.89	5923.42	9032.19	105.993	1450.06	237.514	4239.73	7757.49	13674.3	633.185	3251.39	1700.89		TCGA-AA-3681	N1	Colorectal Cancer	Colon Adenocarcinoma	NA		TCGA-D5-6529-01A	614		0			TCGA-CK-5912-01A	1493		1
	TCGA_AA_3712_Norm	0.9776		TCGA-AZ-6599-01A	8.1518	0		TCGA-CA-5256-01A	Primary Solid Tumor	colon adenocarcinoma	4.2267	58.5916	0.948615		TCGA-CA-5256-01A	Primary Solid Tumor	colon adenocarcinoma	7181.09	3247.66	12961	8607.58	129.441	9688.55	496.632	16638.2	7876.9	8125.21	608.638	4473.91	3256.12		TCGA-AA-3685	N0	Colorectal Cancer	Colon Adenocarcinoma	-0.7337		TCGA-CM-6678-01A	122		0			TCGA-G4-6309-01A	1574		0
	TCGA_AA_3713	0.8972		TCGA-AZ-6600-01A	29.6988	225.944		TCGA-CA-5797-01A	Primary Solid Tumor	colon adenocarcinoma	21.5854	175.299	1.03849		TCGA-CA-5797-01A	Primary Solid Tumor	colon adenocarcinoma	4842.2	10394.1	6292.15	41986.2	303.684	5213.61	861.556	19458.1	4317.08	14088.2	970.971	1811.31	6166.36		TCGA-AA-3688	N1	Colorectal Cancer	Colon Adenocarcinoma	NA		TCGA-AZ-4684-01A	1825		0			TCGA-G4-6303-01A	1825		0
	TCGA_AA_3713_Norm	1		TCGA-AZ-6601-01A	25.7384	16.5907		TCGA-CA-6715-01A	Primary Solid Tumor	colon adenocarcinoma	19.5861	38.0092	0.896265		TCGA-CA-6715-01A	Primary Solid Tumor	colon adenocarcinoma	3663.71	9515.52	9210.27	41390.6	240.946	2166.67	963.784	13999.6	6846.27	10292.7	755.359	3370.29	3333.89		TCGA-AA-3693	N1	Colorectal Cancer	Colon Adenocarcinoma	NA		TCGA-G4-6586-01A	1089		0			TCGA-QG-A5Z2-01A	952		0
	TCGA_AA_3833	0.9287		TCGA-AZ-6603-01A	24.4995	141.743		TCGA-CA-6716-01A	Primary Solid Tumor	colon adenocarcinoma	24.6102	0	0.968197		TCGA-CA-6716-01A	Primary Solid Tumor	colon adenocarcinoma	4087.83	9107.46	7399.6	45027.3	476.504	4733.21	734.91	22354.1	5011.99	7871.86	883.42	2191.15	5262.9		TCGA-AA-3695	N2	Colorectal Cancer	Colon Adenocarcinoma	NA		TCGA-5M-AATE-01A	1200		0			TCGA-D5-6920-01A	377		0
	TCGA_AA_3860	0.6194		TCGA-AZ-6605-01A	41.8307	150.57		TCGA-CA-6718-01A	Primary Solid Tumor	colon adenocarcinoma	18.0251	55.7128	0.959602		TCGA-CA-6718-01A	Primary Solid Tumor	colon adenocarcinoma	2644.59	8975.31	8163.01	62451.8	235.502	4052.51	601.489	21922.4	6047.41	10858.9	685.345	2219.44	8127.86		TCGA-AA-3696	N1	Colorectal Cancer	Colon Adenocarcinoma	NA		TCGA-CM-4751-01A	607		0			TCGA-AD-6901-01A	682		1
	TCGA_AA_3866	0.8506		TCGA-AZ-6606-01A	11.6436	0		TCGA-CA-6719-01A	Primary Solid Tumor	colon adenocarcinoma	28.7436	268.253	1.29305		TCGA-CA-6719-01A	Primary Solid Tumor	colon adenocarcinoma	4447.84	13909.6	7042.19	67712.6	786.741	7153.92	1344.46	31487.7	5617.99	5127.49	983.31	2663.42	11001.6		TCGA-AA-3697	N0	Colorectal Cancer	Colon Adenocarcinoma	-1.1328		TCGA-CK-5913-01A	1561		0			TCGA-AD-6963-01A	834		0
	TCGA_AA_3872	1		TCGA-AZ-6607-01A	11.3672	164.929		TCGA-CK-4947-01B	Primary Solid Tumor	colon adenocarcinoma	11.8343	93.4241	0.999667		TCGA-CK-4947-01B	Primary Solid Tumor	colon adenocarcinoma	4314.03	8380.81	14011.8	37883.3	280.642	4313.19	625.528	14962.8	5875.32	9979.71	1021.56	4196.96	6263.82		TCGA-AA-3710	N0	Colorectal Cancer	Colon Adenocarcinoma	NA		TCGA-AY-A8YK-01A	573		0			TCGA-A6-5667-01A	320		0
	TCGA_AA_3984	0.7094		TCGA-AZ-6608-01A	8.5714	41.6481		TCGA-CK-4948-01B	Primary Solid Tumor	colon adenocarcinoma	26.6447	95.4452	1.19174		TCGA-CK-4948-01B	Primary Solid Tumor	colon adenocarcinoma	3498.68	12536.8	8282.89	128070	268.75	5598.03	502.632	29743.1	5366.12	14140.1	506.908	3363.16	13119.9		TCGA-AA-3712	N2	Colorectal Cancer	Colon Adenocarcinoma	0.4173		TCGA-D5-6538-01A	521		0			TCGA-CM-4747-01A	244		0
	TCGA_AA_3994	1		TCGA-CA-5254-01A	10.2282	0.0045		TCGA-CK-5912-01A	Primary Solid Tumor	colon adenocarcinoma	14.4711	100.726	1.0148		TCGA-CK-5912-01A	Primary Solid Tumor	colon adenocarcinoma	4538.92	10238	9476.05	13348.8	311.377	3832.83	2437.62	10557.9	5694.61	916.168	1128.24	2967.07	4283.43		TCGA-AA-3713	N0	Colorectal Cancer	Colon Adenocarcinoma	-0.6388		TCGA-CM-5868-01A	426		0			TCGA-CK-4948-01B	1825		0
	TCGA_AA_A00O	0.6194		TCGA-CA-5255-01A	2.7747	0		TCGA-CK-5913-01A	Primary Solid Tumor	colon adenocarcinoma	16.4072	321.748	0.950968		TCGA-CK-5913-01A	Primary Solid Tumor	colon adenocarcinoma	5278.08	9063.53	7550.27	71198.1	258.729	3695.41	483.803	21698.4	5458.14	9396.72	742.112	2425.75	6596.69		TCGA-AA-3715	N0	Colorectal Cancer	Colon Adenocarcinoma	NA		TCGA-A6-5667-01A	320		0			TCGA-G4-6315-01A	1117		0
	TCGA_AA_A01D	0.7401		TCGA-CA-5256-01A	4.2267	58.5916		TCGA-CK-5914-01A	Primary Solid Tumor	colon adenocarcinoma	15.3908	0	0.982404		TCGA-CK-5914-01A	Primary Solid Tumor	colon adenocarcinoma	3012.96	6419.6	22352	46731.9	170.109	2844.88	476.711	19113.8	6488.05	10820.2	801.944	5250.71	5132.12		TCGA-AA-3811	N2	Colorectal Cancer	Colon Adenocarcinoma	NA		TCGA-DM-A0X9-01A	1825		0			TCGA-CK-4947-01B	534		0
	TCGA_AA_A01P	0.5746		TCGA-CA-5797-01A	21.5854	175.299		TCGA-CK-5915-01A	Primary Solid Tumor	colon adenocarcinoma	7.9929	0	0.727755		TCGA-CK-5915-01A	Primary Solid Tumor	colon adenocarcinoma	4585.7	6419.18	7575.93	14265.1	258.881	1780.64	502.664	6242.9	4273.98	11956	1238.9	1283.75	1922.29		TCGA-AA-3812	N0	Colorectal Cancer	Colon Adenocarcinoma	NA		TCGA-CK-6747-01A	1825		0			TCGA-A6-6141-01A	255		0
	TCGA_AA_A01X	0.9106		TCGA-CA-6715-01A	19.5861	38.0092		TCGA-CK-5916-01A	Primary Solid Tumor	colon adenocarcinoma	10.9289	65.4246	0.895364		TCGA-CK-5916-01A	Primary Solid Tumor	colon adenocarcinoma	4200.33	5995.26	9115.19	45189.3	210.771	3449.36	522.504	16606.7	4487.6	13127.6	985.159	2165.48	7988.91		TCGA-AA-3814	N0	Colorectal Cancer	Colon Adenocarcinoma	NA		TCGA-CM-6165-01A	212		0			TCGA-G4-6310-01A	1372		0
	TCGA_AA_A024	1		TCGA-CA-6716-01A	24.6102	0		TCGA-CK-6746-01A	Primary Solid Tumor	colon adenocarcinoma	6.8431	0	0.707999		TCGA-CK-6746-01A	Primary Solid Tumor	colon adenocarcinoma	5848.54	3517.79	5952.55	13197.5	104.015	1474.45	466.697	6420.62	4996.81	11725.4	1163.32	2285.13	3021.44		TCGA-AA-3815	N0	Colorectal Cancer	Colon Adenocarcinoma	NA		TCGA-NH-A6GA-01A	302		1			TCGA-D5-6536-01A	543		0
	TCGA_AA_A02Y	1		TCGA-CA-6718-01A	18.0251	55.7128		TCGA-CK-6747-01A	Primary Solid Tumor	colon adenocarcinoma	15.7957	105.806	0.875249		TCGA-CK-6747-01A	Primary Solid Tumor	colon adenocarcinoma	4393.78	9676.89	6790.31	23343.1	343.097	4411.04	580.768	13709.9	5990.61	10902.3	797.499	1836.71	4853.69		TCGA-AA-3818	N0	Colorectal Cancer	Colon Adenocarcinoma	NA		TCGA-CK-5914-01A	304		0			TCGA-G4-6306-01A	1359		0
	TCGA_AD_5900	0.8		TCGA-CA-6719-01A	28.7436	268.253		TCGA-CM-4743-01A	Primary Solid Tumor	colon adenocarcinoma	24.2839	149.23	1.33651		TCGA-CM-4743-01A	Primary Solid Tumor	colon adenocarcinoma	13036.7	13371.1	8028.02	28184.3	586.55	8259.03	481.32	19817.6	7517.43	9234.12	607.721	5288.92	7552.62		TCGA-AA-3819	N0	Colorectal Cancer	Colon Adenocarcinoma	NA		TCGA-AA-3506-01A	1765		0			TCGA-G4-6304-01A	1631		0
	TCGA_AD_6548	0.8		TCGA-CK-4947-01B	11.8343	93.4241		TCGA-CM-4744-01A	Primary Solid Tumor	colon adenocarcinoma	7.3433	0	0.62043		TCGA-CM-4744-01A	Primary Solid Tumor	colon adenocarcinoma	3390.7	1965.31	14967.7	5032.51	54.1089	2848.83	148.026	5485.48	7064.3	296.439	363.689	5365.28	2522.87		TCGA-AA-3831	N0	Colorectal Cancer	Colon Adenocarcinoma	NA		TCGA-A6-6140-01A	356		0			TCGA-A6-2675-01A	846		0
	TCGA_AD_6890	1		TCGA-CK-4948-01B	26.6447	95.4452		TCGA-CM-4747-01A	Primary Solid Tumor	colon adenocarcinoma	17.797	95.6999	0.812161		TCGA-CM-4747-01A	Primary Solid Tumor	colon adenocarcinoma	5121.69	4625.3	8343.43	25611.4	204.906	4929.29	414.141	14644.5	4793.17	371.332	1022.61	4512.27	6149		TCGA-AA-3833	N0	Colorectal Cancer	Colon Adenocarcinoma	NA		TCGA-G4-6628-01A	1595		0			TCGA-CM-6677-01A	153		0
	TCGA_AD_6895	0.7699		TCGA-CK-5912-01A	14.4711	100.726		TCGA-CM-4751-01A	Primary Solid Tumor	colon adenocarcinoma	16.4534	0	0.872853		TCGA-CM-4751-01A	Primary Solid Tumor	colon adenocarcinoma	6322.67	8606.95	7662.25	46954.3	259.598	4994.52	473.035	17593.7	5796.16	923.675	674.589	2345.98	9296.82		TCGA-AA-3841	N0	Colorectal Cancer	Colon Adenocarcinoma	NA		TCGA-D5-6927-01A	287		0			TCGA-CM-6163-01A	427		0
	TCGA_AD_6899	0.8842		TCGA-CK-5913-01A	16.4072	321.748		TCGA-CM-5344-01A	Primary Solid Tumor	colon adenocarcinoma	30.0826	77.3475	1.49442		TCGA-CM-5344-01A	Primary Solid Tumor	colon adenocarcinoma	5133.28	13924.8	11994.1	139960	502.527	8419.68	402.91	43400.3	5936.63	10353.3	1158.43	3165.58	13310		TCGA-AA-3842	N1	Colorectal Cancer	Colon Adenocarcinoma	NA		TCGA-AZ-6598-01A	1503		1			TCGA-CM-5868-01A	426		0
	TCGA_AD_6901	0.8889		TCGA-CK-5914-01A	15.3908	0		TCGA-CM-5348-01A	Primary Solid Tumor	colon adenocarcinoma	18.0521	130.767	1.29869		TCGA-CM-5348-01A	Primary Solid Tumor	colon adenocarcinoma	4741.81	10901.8	7361.46	98994.5	730.479	9011.33	657.851	28500	5964.32	1450.88	1003.78	2725.02	19138.9		TCGA-AA-3844	N2	Colorectal Cancer	Colon Adenocarcinoma	NA		TCGA-CK-5912-01A	1493		1			TCGA-AY-A69D-01A	543		0
	TCGA_AD_6964	0.8		TCGA-CK-5915-01A	7.9929	0		TCGA-CM-5349-01A	Primary Solid Tumor	colon adenocarcinoma	28.8298	106.897	1.35023		TCGA-CM-5349-01A	Primary Solid Tumor	colon adenocarcinoma	4417.75	13747.9	14518.4	69472	392.877	7052.57	535.896	23262.3	5917.47	16706	1107.97	3980.21	14224.8		TCGA-AA-3845	N0	Colorectal Cancer	Colon Adenocarcinoma	NA		TCGA-NH-A8F7-01A	543		0			TCGA-5M-AAT6-01A	290		1
	TCGA_AD_6965	0.6598		TCGA-CK-5916-01A	10.9289	65.4246		TCGA-CM-5860-01A	Primary Solid Tumor	colon adenocarcinoma	17.6574	155.932	1.67521		TCGA-CM-5860-01A	Primary Solid Tumor	colon adenocarcinoma	7080.64	8706.3	14944.1	110736	345.497	17038.3	657.446	89297.8	7271.34	1460.27	739.258	4893.47	14495		TCGA-AA-3846	N0	Colorectal Cancer	Colon Adenocarcinoma	NA		TCGA-CM-6171-01A	182		0			TCGA-AZ-4313-01A	1532		0
	TCGA_AD_A5EJ	0.8		TCGA-CK-6746-01A	6.8431	0		TCGA-CM-5861-01A	Primary Solid Tumor	colon adenocarcinoma	20.4947	67.4804	0.837849		TCGA-CM-5861-01A	Primary Solid Tumor	colon adenocarcinoma	7529.33	5839.58	6966.08	23076.3	153.357	2665.02	470.671	10086.9	4491.17	8948.41	826.148	2371.73	3697.53		TCGA-AA-3848	N2	Colorectal Cancer	Colon Adenocarcinoma	NA		TCGA-DM-A282-01A	1825		0			TCGA-A6-6651-01A	259		0
	TCGA_AD_A5EK	0.8136		TCGA-CK-6747-01A	15.7957	105.806		TCGA-CM-5862-01A	Primary Solid Tumor	colon adenocarcinoma	18.9542	81.5893	1.16514		TCGA-CM-5862-01A	Primary Solid Tumor	colon adenocarcinoma	4573.86	5736.6	24629.4	17326.1	213.072	11347.7	1186.27	22630.1	7148.37	960.784	786.274	6708.5	4799.07		TCGA-AA-3850	N0	Colorectal Cancer	Colon Adenocarcinoma	NA		TCGA-AU-3779-01A	441		0			TCGA-CM-5862-01A	153		1
	TCGA_AM_5820	0.7273		TCGA-CM-4743-01A	24.2839	149.23		TCGA-CM-5864-01A	Primary Solid Tumor	colon adenocarcinoma	9.5368	127.147	0.811479		TCGA-CM-5864-01A	Primary Solid Tumor	colon adenocarcinoma	3180.52	5320.16	15754.1	6864.44	119.891	4804.48	1152.59	9805.86	5549.73	455.722	773.842	4369.21	3489.1		TCGA-AA-3851	N0	Colorectal Cancer	Colon Adenocarcinoma	NA		TCGA-DM-A28A-01A	805		1			TCGA-AM-5821-01A	28		0
	TCGA_AM_5821	0.7755		TCGA-CM-4744-01A	7.3433	0		TCGA-CM-5868-01A	Primary Solid Tumor	colon adenocarcinoma	16.129	86.7966	1.19665		TCGA-CM-5868-01A	Primary Solid Tumor	colon adenocarcinoma	5071.68	7151.25	15544.4	59440.1	384.588	7468.45	637.276	26352.7	5339.07	9718.64	1116.13	3970.97	9779.23		TCGA-AA-3855	N0	Colorectal Cancer	Colon Adenocarcinoma	NA		TCGA-G4-6311-01A	1199		0			TCGA-F4-6807-01A	494		0
	TCGA_AU_3779	0.8889		TCGA-CM-4747-01A	17.797	95.6999		TCGA-CM-6161-01A	Primary Solid Tumor	colon adenocarcinoma	9.8501	185.102	0.93014		TCGA-CM-6161-01A	Primary Solid Tumor	colon adenocarcinoma	3179.44	7256.53	11935.3	20155.5	212.42	3038.12	823.555	12647.1	7368.31	15507.9	1266.81	2254.39	5191.51		TCGA-AA-3856	N0	Colorectal Cancer	Colon Adenocarcinoma	NA		TCGA-DM-A1DB-01A	1348		1			TCGA-DM-A28M-01A	1825		0
	TCGA_AU_6004	0.9547		TCGA-CM-4751-01A	16.4534	0		TCGA-CM-6163-01A	Primary Solid Tumor	colon adenocarcinoma	12.5149	86.9026	0.925619		TCGA-CM-6163-01A	Primary Solid Tumor	colon adenocarcinoma	3573.6	4837.2	11961.8	28422.5	379.08	5270.78	507.862	14457.5	6127.44	7009.14	1235.74	3563.11	5524.53		TCGA-AA-3858	N0	Colorectal Cancer	Colon Adenocarcinoma	NA		TCGA-T9-A92H-01A	362		0			TCGA-CM-5344-01A	304		0
	TCGA_AY_5543	0.8		TCGA-CM-5344-01A	30.0826	77.3475		TCGA-CM-6164-01A	Primary Solid Tumor	colon adenocarcinoma	23.3593	36.0559	0.896753		TCGA-CM-6164-01A	Primary Solid Tumor	colon adenocarcinoma	6501.3	7321.1	9316.28	23483.1	276.233	4863.55	543.567	11199.1	4968.11	6070.82	1157.21	3017.06	7249.54		TCGA-AA-3860	N1	Colorectal Cancer	Colon Adenocarcinoma	NA		TCGA-AA-3526-01A	580		0			TCGA-F4-6460-01A	407		0
	TCGA_AY_6196	0.8501		TCGA-CM-5348-01A	18.0521	130.767		TCGA-CM-6165-01A	Primary Solid Tumor	colon adenocarcinoma	15.7558	287.584	1.14198		TCGA-CM-6165-01A	Primary Solid Tumor	colon adenocarcinoma	5787.3	10908.4	9961.1	36867.1	546.529	7450.52	774.495	20712.9	5774.99	5404.23	1246.68	3073.36	9030.83		TCGA-AA-3861	N0	Colorectal Cancer	Colon Adenocarcinoma	NA		TCGA-G4-6626-01A	1422		1			TCGA-AA-A02K-01A	426		1
	TCGA_AY_6197	1		TCGA-CM-5349-01A	28.8298	106.897		TCGA-CM-6166-01A	Primary Solid Tumor	colon adenocarcinoma	19.1617	0	1.09307		TCGA-CM-6166-01A	Primary Solid Tumor	colon adenocarcinoma	4503.59	6288.62	10761.7	23046.7	467.066	6094.01	758.683	14837.7	4652.69	16854.5	954.491	2143.11	4443.87		TCGA-AA-3862	N0	Colorectal Cancer	Colon Adenocarcinoma	NA		TCGA-G4-6588-01A	796		0			TCGA-DM-A1DB-01A	1348		1
	TCGA_AY_6386	0.9371		TCGA-CM-5860-01A	17.6574	155.932		TCGA-CM-6167-01A	Primary Solid Tumor	colon adenocarcinoma	81.611	144.009	2.28573		TCGA-CM-6167-01A	Primary Solid Tumor	colon adenocarcinoma	8482.78	22334.9	7416	150597	1492.85	20478	2355.59	57526.8	6325.91	6324.85	1229.46	2069.42	22466		TCGA-AA-3864	N0	Colorectal Cancer	Colon Adenocarcinoma	NA		TCGA-AD-6963-01A	834		0			TCGA-G4-6588-01A	796		0
	TCGA_AY_A69D	0.8889		TCGA-CM-5861-01A	20.4947	67.4804		TCGA-CM-6168-01A	Primary Solid Tumor	colon adenocarcinoma	23.5938	299.883	1.46315		TCGA-CM-6168-01A	Primary Solid Tumor	colon adenocarcinoma	6664	13377.3	8805.56	112718	632.821	7528.12	1069.73	41710.6	5777.97	9819.25	835.475	2841.37	14506.2		TCGA-AA-3866	N0	Colorectal Cancer	Colon Adenocarcinoma	NA		TCGA-D5-5538-01A	373		0			TCGA-AA-3713-01A	579		0
	TCGA_AY_A71X	0.7179		TCGA-CM-5862-01A	18.9542	81.5893		TCGA-CM-6169-01A	Primary Solid Tumor	colon adenocarcinoma	35.4536	175.5	1.37477		TCGA-CM-6169-01A	Primary Solid Tumor	colon adenocarcinoma	4136.6	18039.6	9479.67	54686.1	660.063	10056.3	1250.26	27514.1	6149.11	4774.77	1343.07	2294.06	13809.8		TCGA-AA-3867	N2	Colorectal Cancer	Colon Adenocarcinoma	NA		TCGA-F4-6806-01A	481		0			TCGA-AZ-4614-01A	172		1
	TCGA_AY_A8YK	0.9209		TCGA-CM-5864-01A	9.5368	127.147		TCGA-CM-6170-01A	Primary Solid Tumor	colon adenocarcinoma	12.0582	0	0.943447		TCGA-CM-6170-01A	Primary Solid Tumor	colon adenocarcinoma	6039.5	5438.25	11210.8	54176.7	253.638	4884.82	529.73	18420	5421.21	4271.52	1457.38	3237.01	5566.54		TCGA-AA-3869	N2	Colorectal Cancer	Colon Adenocarcinoma	NA		TCGA-D5-6535-01A	460		0			TCGA-A6-6653-01A	282		0
	TCGA_AZ_4323	0.8997		TCGA-CM-5868-01A	16.129	86.7966		TCGA-CM-6171-01A	Primary Solid Tumor	colon adenocarcinoma	14.3966	37.9078	0.887173		TCGA-CM-6171-01A	Primary Solid Tumor	colon adenocarcinoma	4127.32	10037.1	6305.25	20192.6	195.703	2841.08	614.104	8689.69	4780.56	9586.32	1060.4	1619.62	4197.73		TCGA-AA-3870	N2	Colorectal Cancer	Colon Adenocarcinoma	NA		TCGA-DM-A28H-01A	1825		0			TCGA-AZ-4616-01A	156		1
	TCGA_AZ_4615	0.8889		TCGA-CM-6161-01A	9.8501	185.102		TCGA-CM-6172-01A	Primary Solid Tumor	colon adenocarcinoma	11.0919	68.6547	0.830518		TCGA-CM-6172-01A	Primary Solid Tumor	colon adenocarcinoma	3877.07	8821.26	11475	34112.5	215.829	4125.25	641.017	13135.1	4952.98	2343.15	1252.92	2404.62	5329.64		TCGA-AA-3872	N2	Colorectal Cancer	Colon Adenocarcinoma	NA		TCGA-AA-3660-01A	1825		0			TCGA-CM-6172-01A	212		0
	TCGA_AZ_4682	1		TCGA-CM-6163-01A	12.5149	86.9026		TCGA-CM-6674-01A	Primary Solid Tumor	colon adenocarcinoma	29.9097	176.127	1.07691		TCGA-CM-6674-01A	Primary Solid Tumor	colon adenocarcinoma	5262.42	6898.98	8356.66	110095	318.849	4978.56	424.944	28199.2	6759.59	9188.49	725.734	2493.23	9866.25		TCGA-AA-3875	N0	Colorectal Cancer	Colon Adenocarcinoma	NA		TCGA-CM-6163-01A	427		0			TCGA-CM-5861-01A	335		0
	TCGA_AZ_4684	1		TCGA-CM-6164-01A	23.3593	36.0559		TCGA-CM-6675-01A	Primary Solid Tumor	colon adenocarcinoma	10.8793	122.575	0.684373		TCGA-CM-6675-01A	Primary Solid Tumor	colon adenocarcinoma	4196.98	4680.09	2540.91	39021.5	174.068	3193.67	572.571	14382	6656.9	296.158	963.418	1716.91	4015.69		TCGA-AA-3930	N2	Colorectal Cancer	Colon Adenocarcinoma	NA		TCGA-AA-A01Z-01A	1126		0			TCGA-NH-A6GA-01A	302		1
	TCGA_AZ_5403	1		TCGA-CM-6165-01A	15.7558	287.584		TCGA-CM-6676-01A	Primary Solid Tumor	colon adenocarcinoma	18.0258	115.138	0.969689		TCGA-CM-6676-01A	Primary Solid Tumor	colon adenocarcinoma	3976.82	8055.36	6992.27	35197.9	531.331	5564.38	634.335	17795.3	4669.1	12195.3	735.622	2539.91	6724.45		TCGA-AA-3939	N0	Colorectal Cancer	Colon Adenocarcinoma	NA		TCGA-F4-6808-01A	1024		0			TCGA-A6-2682-01A	424		1
	TCGA_AZ_6598_Norm	0.9611		TCGA-CM-6166-01A	19.1617	0		TCGA-CM-6677-01A	Primary Solid Tumor	colon adenocarcinoma	25.0508	87.933	0.984645		TCGA-CM-6677-01A	Primary Solid Tumor	colon adenocarcinoma	4175.36	10454.3	9770.48	57390.7	377.793	6148.95	484.766	20626.9	5035.21	8486.12	626.269	3171.97	7300.92		TCGA-AA-3941	N1b	Colorectal Cancer	Colon Adenocarcinoma	NA		TCGA-AA-A02K-01A	426		1			TCGA-CK-5916-01A	643		1
	TCGA_AZ_6599	1		TCGA-CM-6167-01A	81.611	144.009		TCGA-CM-6678-01A	Primary Solid Tumor	colon adenocarcinoma	16.9713	7.7143	1.04802		TCGA-CM-6678-01A	Primary Solid Tumor	colon adenocarcinoma	4336.81	6632.29	11358.1	22695	292.428	4542.21	427.328	11562.2	6671.45	18107.5	618.364	5090.51	5589.64		TCGA-AA-3952	N2	Colorectal Cancer	Colon Adenocarcinoma	NA		TCGA-D5-5541-01A	350		0			TCGA-A6-6648-01A	344		0
	TCGA_AZ_6599_Norm	0.9231		TCGA-CM-6168-01A	23.5938	299.883		TCGA-CM-6679-01A	Primary Solid Tumor	colon adenocarcinoma	26.0458	18.9229	1.39516		TCGA-CM-6679-01A	Primary Solid Tumor	colon adenocarcinoma	6378.06	10976.7	10388.3	127636	528.808	8791.63	816.496	44490.5	5804.66	2013.42	1509.47	2838.6	11262.2		TCGA-AA-3955	N2a	Colorectal Cancer	Colon Adenocarcinoma	NA		TCGA-CM-6170-01A	242		0			TCGA-AY-5543-01A	479		0
	TCGA_AZ_6600	0.7843		TCGA-CM-6169-01A	35.4536	175.5		TCGA-CM-6680-01A	Primary Solid Tumor	colon adenocarcinoma	20.3916	249.174	0.994342		TCGA-CM-6680-01A	Primary Solid Tumor	colon adenocarcinoma	4131.62	10097.6	6226.86	49692.5	424.516	6557.29	760.978	16761	4478.28	6750.09	1374.58	1679.06	9122.03		TCGA-AA-3956	N0	Colorectal Cancer	Colon Adenocarcinoma	NA		TCGA-A6-6650-01A	278		0			TCGA-DM-A1DA-01A	228		1
	TCGA_AZ_6600_Norm	0.8696		TCGA-CM-6170-01A	12.0582	0		TCGA-D5-5537-01A	Primary Solid Tumor	colon adenocarcinoma	18.31	0	1.06324		TCGA-D5-5537-01A	Primary Solid Tumor	colon adenocarcinoma	4080.17	7024.62	6490.16	57863.7	489.422	5097.61	544.847	23233.5	7413.09	10472.3	1027.34	3054.81	6903.87		TCGA-AA-3967	N1	Colorectal Cancer	Colon Adenocarcinoma	NA		TCGA-G4-6309-01A	1574		0			TCGA-G4-6626-01A	1422		1
	TCGA_AZ_6601	0.6707		TCGA-CM-6171-01A	14.3966	37.9078		TCGA-D5-5538-01A	Primary Solid Tumor	colon adenocarcinoma	12.8474	130.562	1.14818		TCGA-D5-5538-01A	Primary Solid Tumor	colon adenocarcinoma	6529.46	7882.89	9304.01	56783.2	181.346	6016.55	841.013	29730.9	7252.38	7565.66	830.142	5084.62	12667.6		TCGA-AA-3968	N0	Colorectal Cancer	Colon Adenocarcinoma	NA		TCGA-CK-4947-01B	534		0			TCGA-CA-5256-01A	65		0
	TCGA_AZ_6601_Norm	0.9106		TCGA-CM-6172-01A	11.0919	68.6547		TCGA-D5-5540-01A	Primary Solid Tumor	colon adenocarcinoma	3.0788	30.6069	1.16207		TCGA-D5-5540-01A	Primary Solid Tumor	colon adenocarcinoma	6011.08	2671.8	24697	7089.9	83.7438	4424.26	375	17586.8	11491.4	19485.8	985.222	7784.48	3016.63		TCGA-AA-3970	N0	Colorectal Cancer	Colon Adenocarcinoma	NA		TCGA-A6-6141-01A	255		0			TCGA-AY-A54L-01A	525		0
	TCGA_AZ_6603	0.8889		TCGA-CM-6674-01A	29.9097	176.127		TCGA-D5-5541-01A	Primary Solid Tumor	colon adenocarcinoma	12.3203	104.93	0.95782		TCGA-D5-5541-01A	Primary Solid Tumor	colon adenocarcinoma	3988.02	4816.22	8415.47	27202.3	342.231	4774.81	1074.26	15666.7	5893.22	10193.4	832.649	2592.4	9103.7		TCGA-AA-3971	N1	Colorectal Cancer	Colon Adenocarcinoma	NA		TCGA-AZ-6606-01A	357		1			TCGA-5M-AATE-01A	1200		0
	TCGA_AZ_6605	0.8932		TCGA-CM-6675-01A	10.8793	122.575		TCGA-D5-6529-01A	Primary Solid Tumor	colon adenocarcinoma	17.4873	236.73	1.3168		TCGA-D5-6529-01A	Primary Solid Tumor	colon adenocarcinoma	4117.81	11096.6	7493.33	173831	490.106	5543.49	523.7	38999.1	6412.33	6352.51	737.69	3147.72	14341.3		TCGA-AA-3972	N1	Colorectal Cancer	Colon Adenocarcinoma	NA		TCGA-G4-6320-01A	804		0			TCGA-CA-6718-01A	306		1
	TCGA_AZ_6605_Norm	1		TCGA-CM-6676-01A	18.0258	115.138		TCGA-D5-6530-01A	Primary Solid Tumor	colon adenocarcinoma	3.9641	109.748	0.603608		TCGA-D5-6530-01A	Primary Solid Tumor	colon adenocarcinoma	3257.04	3393.8	5771.79	41741.4	77.7963	1346.82	459.345	8143.84	4442.81	5011.67	1109.96	1571.78	4339.68		TCGA-AA-3973	N1	Colorectal Cancer	Colon Adenocarcinoma	NA		TCGA-G4-6307-01A	1674		0			TCGA-D5-6929-01A	408		0
	TCGA_AZ_6606	0.8972		TCGA-CM-6677-01A	25.0508	87.933		TCGA-D5-6531-01A	Primary Solid Tumor	colon adenocarcinoma	19.9107	273.223	0.950199		TCGA-D5-6531-01A	Primary Solid Tumor	colon adenocarcinoma	3181.62	5393.75	7501.72	56122.5	343.076	4415.57	685.131	15351.6	5612.25	14375	634.078	2719.59	6885.08		TCGA-AA-3975	N0	Colorectal Cancer	Colon Adenocarcinoma	NA		TCGA-AZ-6607-01A	97		1			TCGA-DM-A0XD-01A	743		1
	TCGA_AZ_6607	0.9371		TCGA-CM-6678-01A	16.9713	7.7143		TCGA-D5-6532-01A	Primary Solid Tumor	colon adenocarcinoma	10.1054	144.451	0.801612		TCGA-D5-6532-01A	Primary Solid Tumor	colon adenocarcinoma	3431.9	4963.53	9642.79	24153.3	180.141	1801.85	895.87	7968.8	4371.27	11515.8	869.508	4953.43	2433.22		TCGA-AA-3976	N1	Colorectal Cancer	Colon Adenocarcinoma	NA		TCGA-AD-6965-01A	805		0			TCGA-G4-6294-01A	858		1
	TCGA_CA_5254	0.9106		TCGA-CM-6679-01A	26.0458	18.9229		TCGA-D5-6533-01A	Primary Solid Tumor	colon adenocarcinoma	31.0078	165.899	1.01189		TCGA-D5-6533-01A	Primary Solid Tumor	colon adenocarcinoma	5091.2	11239.4	9151.85	29215.2	482.9	3816.69	940.721	12161	4958.5	9775.19	871.409	4537.16	4501.96		TCGA-AA-3977	N0	Colorectal Cancer	Colon Adenocarcinoma	NA		TCGA-A6-6648-01A	344		0			TCGA-DM-A1D8-01A	383		1
	TCGA_CA_5255	1		TCGA-CM-6680-01A	20.3916	249.174		TCGA-D5-6535-01A	Primary Solid Tumor	colon adenocarcinoma	12.6659	226.202	0.864242		TCGA-D5-6535-01A	Primary Solid Tumor	colon adenocarcinoma	6546.83	5638.29	7332.12	61212.5	149.555	2713.92	525.149	14559	6510.78	6110.83	1192.55	3062.72	5431.38		TCGA-AA-3979	N0	Colorectal Cancer	Colon Adenocarcinoma	NA		TCGA-CM-6172-01A	212		0			TCGA-AD-6889-01A	1825		0
	TCGA_CA_5256	0.8358		TCGA-D5-5537-01A	18.31	0		TCGA-D5-6536-01A	Primary Solid Tumor	colon adenocarcinoma	28.909	90.62	1.12383		TCGA-D5-6536-01A	Primary Solid Tumor	colon adenocarcinoma	5571.09	14936.5	8446.98	86382.8	286.866	2905.91	572.064	20265.7	5337.6	5829.05	731.063	3541.9	10525		TCGA-AA-3980	N0	Colorectal Cancer	Colon Adenocarcinoma	NA		TCGA-CK-5916-01A	643		1			TCGA-DM-A1D4-01A	1825		0
	TCGA_CA_5796	0.8972		TCGA-D5-5538-01A	12.8474	130.562		TCGA-D5-6537-01A	Primary Solid Tumor	colon adenocarcinoma	8.1179	0.3631	0.826194		TCGA-D5-6537-01A	Primary Solid Tumor	colon adenocarcinoma	3956.84	2857.51	11953	19723.5	192.694	1296.73	370.006	7230.93	7273.65	18210.6	513.565	3803.46	2863.06		TCGA-AA-3982	N1	Colorectal Cancer	Colon Adenocarcinoma	NA		TCGA-RU-A8FL-01A	1177		0			TCGA-A6-4105-01A	442		1
	TCGA_CA_5797	0.6207		TCGA-D5-5540-01A	3.0788	30.6069		TCGA-D5-6538-01A	Primary Solid Tumor	colon adenocarcinoma	16.1616	104.613	0.724757		TCGA-D5-6538-01A	Primary Solid Tumor	colon adenocarcinoma	1714.03	8003.14	9854.99	12595.7	348.373	2143.66	709.764	6720.09	5231.87	6562.96	839.506	2688.22	2833.67		TCGA-AA-3984	N0	Colorectal Cancer	Colon Adenocarcinoma	NA		TCGA-CM-6675-01A	153		0			TCGA-NH-A8F7-01A	543		0
	TCGA_CA_6715	0.9252		TCGA-D5-5541-01A	12.3203	104.93		TCGA-D5-6539-01A	Primary Solid Tumor	colon adenocarcinoma	18.142	226.036	0.817076		TCGA-D5-6539-01A	Primary Solid Tumor	colon adenocarcinoma	5824.51	12297.9	7097.24	16278	282.364	2945.51	904.773	11270.8	5799.39	1845.83	880.119	2157.97	5390.96		TCGA-AA-3986	N0	Colorectal Cancer	Colon Adenocarcinoma	NA		TCGA-AA-3492-01A	92		1			TCGA-AZ-6608-01A	59		1
	TCGA_CA_6716	1		TCGA-D5-6529-01A	17.4873	236.73		TCGA-D5-6541-01A	Primary Solid Tumor	colon adenocarcinoma	17.9409	146.278	1.37779		TCGA-D5-6541-01A	Primary Solid Tumor	colon adenocarcinoma	7160.9	9696.9	5438.57	105918	451.69	7419.1	1159.48	52317.2	6357.07	8488.53	964.941	2908.9	13929.5		TCGA-AA-3989	N2	Colorectal Cancer	Colon Adenocarcinoma	NA		TCGA-A6-A5ZU-01A	293		0			TCGA-G4-6307-01A	1674		0
	TCGA_CA_6717	0.8997		TCGA-D5-6530-01A	3.9641	109.748		TCGA-D5-6898-01A	Primary Solid Tumor	colon adenocarcinoma	18.0732	140.956	1.07472		TCGA-D5-6898-01A	Primary Solid Tumor	colon adenocarcinoma	5243.8	10109.5	6548.39	28323.2	458.099	6312.33	883.741	16114.3	6155.94	11735.8	964.148	2699.91	8949.21		TCGA-AA-A004	N0	Colorectal Cancer	Colon Adenocarcinoma	NA		TCGA-A6-5666-01A	362		0			TCGA-AZ-5403-01A	1825		0
	TCGA_CA_6718	0.929		TCGA-D5-6531-01A	19.9107	273.223		TCGA-D5-6920-01A	Primary Solid Tumor	colon adenocarcinoma	18.1102	97.7026	0.81692		TCGA-D5-6920-01A	Primary Solid Tumor	colon adenocarcinoma	7047.64	9639.37	5328.35	29166.5	210.236	2846.46	696.85	9348.82	5272.83	9832.28	822.835	1744.49	5632.28		TCGA-AA-A00A	N0	Colorectal Cancer	Colon Adenocarcinoma	NA		TCGA-AA-3655-01A	1825		0			TCGA-CA-6715-01A	383		0
	TCGA_CA_6719	0.8946		TCGA-D5-6532-01A	10.1054	144.451		TCGA-D5-6922-01A	Primary Solid Tumor	colon adenocarcinoma	26.2803	111.433	1.00808		TCGA-D5-6922-01A	Primary Solid Tumor	colon adenocarcinoma	4125.28	9190.17	6424.62	64768.6	421.924	6060.3	857.169	22230.9	4021.6	7520.12	966.25	1992.26	7794.68		TCGA-AA-A00D	N0	Colorectal Cancer	Colon Adenocarcinoma	NA		TCGA-AZ-4614-01A	172		1			TCGA-CM-6171-01A	182		0
	TCGA_CK_4947	0.9106		TCGA-D5-6533-01A	31.0078	165.899		TCGA-D5-6923-01A	Primary Solid Tumor	colon adenocarcinoma	37.9519	281.665	1.46333		TCGA-D5-6923-01A	Primary Solid Tumor	colon adenocarcinoma	4387.04	22580.1	6879.44	206459	387.044	7098.64	610.502	42670.4	4870.93	11336.8	815.639	2104.04	12879.8		TCGA-AA-A00E	N0	Colorectal Cancer	Colon Adenocarcinoma	NA		TCGA-G4-6298-01A	715		1			TCGA-AY-A8YK-01A	573		0
	TCGA_CK_4948	0.9252		TCGA-D5-6535-01A	12.6659	226.202		TCGA-D5-6924-01A	Primary Solid Tumor	colon adenocarcinoma	25.7979	0	1.40054		TCGA-D5-6924-01A	Primary Solid Tumor	colon adenocarcinoma	3785.68	20459.1	7158.59	182629	372.416	5057.05	1040.52	44391.6	4855.96	9766.17	935.34	2437.57	12622.6		TCGA-AA-A00F	N2	Colorectal Cancer	Colon Adenocarcinoma	NA		TCGA-D5-6931-01A	365		0			TCGA-CM-6164-01A	487		0
	TCGA_CK_4950	0.9632		TCGA-D5-6536-01A	28.909	90.62		TCGA-D5-6926-01A	Primary Solid Tumor	colon adenocarcinoma	28.121	345.554	1.44029		TCGA-D5-6926-01A	Primary Solid Tumor	colon adenocarcinoma	4818.92	15471.7	9697.49	169905	313.592	6152.96	1039.2	43962.5	4620.79	3455.48	904.133	7508.73	13443		TCGA-AA-A00K	N0	Colorectal Cancer	Colon Adenocarcinoma	NA		TCGA-DM-A0XD-01A	743		1			TCGA-AZ-4682-01B	680		1
	TCGA_CK_4951	1		TCGA-D5-6537-01A	8.1179	0.3631		TCGA-D5-6927-01A	Primary Solid Tumor	colon adenocarcinoma	14.6665	0	1.04705		TCGA-D5-6927-01A	Primary Solid Tumor	colon adenocarcinoma	4447.89	10172.3	5620.65	103355	313.637	3322.52	516.147	23184.3	5138.34	16138.2	749.119	2157.66	10426.3		TCGA-AA-A00L	N0	Colorectal Cancer	Colon Adenocarcinoma	NA		TCGA-AY-6386-01A	360		0			TCGA-D5-5540-01A	411		0
	TCGA_CK_4952	0.8451		TCGA-D5-6538-01A	16.1616	104.613		TCGA-D5-6929-01A	Primary Solid Tumor	colon adenocarcinoma	33.6913	55.5211	1.28709		TCGA-D5-6929-01A	Primary Solid Tumor	colon adenocarcinoma	6952.24	7647.93	7177.44	132196	329.229	6140.1	1062.16	51141.7	5553.75	9790.58	546.154	3016.85	12784.1		TCGA-AA-A00O	N2	Colorectal Cancer	Colon Adenocarcinoma	NA		TCGA-A6-2686-01A	488		0			TCGA-QG-A5YX-01A	1003		0
	TCGA_CK_5912	0.6857		TCGA-D5-6539-01A	18.142	226.036		TCGA-D5-6931-01A	Primary Solid Tumor	colon adenocarcinoma	10.29	113.938	0.919267		TCGA-D5-6931-01A	Primary Solid Tumor	colon adenocarcinoma	3197.85	9729.65	8526.19	61992	253.976	3177.27	587.465	15795.6	6355.94	11526.2	772.217	2397.1	6909.96		TCGA-AA-A00Q	N1	Colorectal Cancer	Colon Adenocarcinoma	NA		TCGA-CA-5254-01A	68		0			TCGA-G4-6317-01A	1095		0
	TCGA_CK_5913	0.8451		TCGA-D5-6541-01A	17.9409	146.278		TCGA-D5-6932-01A	Primary Solid Tumor	colon adenocarcinoma	34.7355	162.872	1.20062		TCGA-D5-6932-01A	Primary Solid Tumor	colon adenocarcinoma	6299.76	12921.2	14793.7	82930.4	319.838	5152.14	687.493	21209.9	5791.36	4875.16	725.386	6235.71	11405.9		TCGA-AA-A00R	N0	Colorectal Cancer	Colon Adenocarcinoma	NA		TCGA-D5-6532-01A	555		0			TCGA-AA-A01Z-01A	1126		0
	TCGA_CK_5914	1		TCGA-D5-6898-01A	18.0732	140.956		TCGA-DM-A0X9-01A	Primary Solid Tumor	colon adenocarcinoma	16.0617	151.964	0.829612		TCGA-DM-A0X9-01A	Primary Solid Tumor	colon adenocarcinoma	2799.23	6022.17	12842.9	20691.3	188.885	2636.36	345.647	9416.96	5243.49	17137.8	807.902	3477.03	3165.87		TCGA-AA-A00U	N1	Colorectal Cancer	Colon Adenocarcinoma	NA		TCGA-AA-3713-01A	579		0			TCGA-5M-AAT4-01A	49		1
	TCGA_CK_5915	1		TCGA-D5-6920-01A	18.1102	97.7026		TCGA-DM-A0XD-01A	Primary Solid Tumor	colon adenocarcinoma	10.272	51.7885	0.978258		TCGA-DM-A0XD-01A	Primary Solid Tumor	colon adenocarcinoma	4909.54	4295.55	7973.39	75119.4	181.16	3033.5	241.391	18344.8	5925.06	20044.4	585.969	3374.81	5209.76		TCGA-AA-A00W	N0	Colorectal Cancer	Colon Adenocarcinoma	NA		TCGA-AA-3509-01A	1825		0			TCGA-AA-3502-01A	1065		0
	TCGA_CK_5916	0.8972		TCGA-D5-6922-01A	26.2803	111.433		TCGA-DM-A1D0-01A	Primary Solid Tumor	colon adenocarcinoma	8.6609	131.143	0.81942		TCGA-DM-A1D0-01A	Primary Solid Tumor	colon adenocarcinoma	4918.72	2511.33	17955.4	7322.45	120.586	1446.7	235.843	3973.35	7146.9	4712.86	1164.56	7289.47	1984.01		TCGA-AA-A00Z	N0	Colorectal Cancer	Colon Adenocarcinoma	NA		TCGA-DM-A1D8-01A	383		1			TCGA-CM-6679-01A	122		0
	TCGA_CK_6746	1		TCGA-D5-6923-01A	37.9519	281.665		TCGA-DM-A1D4-01A	Primary Solid Tumor	colon adenocarcinoma	8.9686	45.9011	0.62236		TCGA-DM-A1D4-01A	Primary Solid Tumor	colon adenocarcinoma	4425.19	3512.43	13951.9	7172.44	70.1182	1618.83	333.877	3957.6	4591.93	174.48	960.049	4564.61	1768.85		TCGA-AA-A010	N0	Colorectal Cancer	Colon Adenocarcinoma	NA		TCGA-DM-A1DA-01A	228		1			TCGA-AZ-4315-01A	1776		0
	TCGA_CK_6747	0.9357		TCGA-D5-6924-01A	25.7979	0		TCGA-DM-A1D8-01A	Primary Solid Tumor	colon adenocarcinoma	9.9108	48.3634	0.593334		TCGA-DM-A1D8-01A	Primary Solid Tumor	colon adenocarcinoma	2676.91	2163.53	8108.69	12812.7	192.27	2682.52	593.327	7060.79	3222.33	5209.12	947.142	2055.17	2579.45		TCGA-AA-A017	N0	Colorectal Cancer	Colon Adenocarcinoma	NA		TCGA-CM-6161-01A	212		0			TCGA-AZ-6601-01A	1825		0
	TCGA_CK_6748	0.9376		TCGA-D5-6926-01A	28.121	345.554		TCGA-DM-A1D9-01A	Primary Solid Tumor	colon adenocarcinoma	6.2914	112.018	0.824271		TCGA-DM-A1D9-01A	Primary Solid Tumor	colon adenocarcinoma	5745.03	2871.19	10733.8	18089.7	161.589	2858.61	526.821	8825.17	6139.4	11383.8	1130.46	3269.21	2976.67		TCGA-AA-A01C	N1	Colorectal Cancer	Colon Adenocarcinoma	NA		TCGA-QG-A5Z1-01A	256		1			TCGA-T9-A92H-01A	362		0
	TCGA_CK_6751	0.8533		TCGA-D5-6927-01A	14.6665	0		TCGA-DM-A1DA-01A	Primary Solid Tumor	colon adenocarcinoma	9.8632	61.1085	0.682622		TCGA-DM-A1DA-01A	Primary Solid Tumor	colon adenocarcinoma	1771.56	3530.7	15172.4	22043.6	212.854	1337.58	251.67	7958.64	6178.17	9866.37	549.793	3981.23	2415.53		TCGA-AA-A01F	N1	Colorectal Cancer	Colon Adenocarcinoma	NA		TCGA-DM-A28F-01A	1094		1			TCGA-RU-A8FL-01A	1177		0
	TCGA_CM_4743	0.7179		TCGA-D5-6929-01A	33.6913	55.5211		TCGA-DM-A1DB-01A	Primary Solid Tumor	colon adenocarcinoma	13.4767	74.4324	0.722922		TCGA-DM-A1DB-01A	Primary Solid Tumor	colon adenocarcinoma	2586.38	4580.93	9921.15	7161	124.731	1510.54	373.62	5193.12	4698.78	17805.3	1168.17	2364.44	2890.32		TCGA-AA-A01I	N0	Colorectal Cancer	Colon Adenocarcinoma	NA		TCGA-CM-5864-01A	61		0			TCGA-AZ-5407-01A	1825		0
	TCGA_CM_4747	0.6857		TCGA-D5-6931-01A	10.29	113.938		TCGA-DM-A1HA-01A	Primary Solid Tumor	colon adenocarcinoma	7.9856	0	0.620406		TCGA-DM-A1HA-01A	Primary Solid Tumor	colon adenocarcinoma	3088.84	1601.52	12177.3	4351.37	116.191	945.897	255.141	2396.89	5771.21	9164.3	971.851	3584.35	1421.64		TCGA-AA-A01K	N2	Colorectal Cancer	Colon Adenocarcinoma	NA		TCGA-AY-6197-01A	423			0		TCGA-AU-3779-01A	441			0
	TCGA_CM_4751	0.9651		TCGA-D5-6932-01A	34.7355	162.872		TCGA-DM-A282-01A	Primary Solid Tumor	colon adenocarcinoma	14.0845	137.469	0.915202		TCGA-DM-A282-01A	Primary Solid Tumor	colon adenocarcinoma	4666.67	5549.72	8230.47	46451.1	273.154	4581.31	472.044	17046.1	4409.73	10906.1	863.85	2829.71	4262.91		TCGA-AA-A01P	N1	Colorectal Cancer	Colon Adenocarcinoma	2.0514		TCGA-A6-5659-01A	286			0		TCGA-AA-3663-01A	212			0
	TCGA_CM_5344	0.8675		TCGA-DM-A0X9-01A	16.0617	151.964		TCGA-DM-A28A-01A	Primary Solid Tumor	colon adenocarcinoma	13.9299	215.976	1.05361		TCGA-DM-A28A-01A	Primary Solid Tumor	colon adenocarcinoma	3610.81	6476.15	12187.4	117402	219.08	3581.68	455.466	24253.3	3564.37	12283.2	1095.82	3414.1	7279.82		TCGA-AA-A01Q	N0	Colorectal Cancer	Colon Adenocarcinoma	NA		TCGA-4N-A93T-01A	146			0		TCGA-G4-6586-01A	1089			0
	TCGA_CM_5348	0.9412		TCGA-DM-A0XD-01A	10.272	51.7885		TCGA-DM-A28C-01A	Primary Solid Tumor	colon adenocarcinoma	2.061	211.977	0.627135		TCGA-DM-A28C-01A	Primary Solid Tumor	colon adenocarcinoma	3639.32	3470.73	5188.79	15130.7	366.447	1671.48	624.072	4920.45	3208.57	9016.08	1017.31	1298.85	1881.11		TCGA-AA-A01S	N1	Colorectal Cancer	Colon Adenocarcinoma	NA		TCGA-AA-3495-01A	1127			0		TCGA-CM-6678-01A	122			0
	TCGA_CM_5860	0.8889		TCGA-DM-A1D0-01A	8.6609	131.143		TCGA-DM-A28E-01A	Primary Solid Tumor	colon adenocarcinoma	6.7355	0	0.643003		TCGA-DM-A28E-01A	Primary Solid Tumor	colon adenocarcinoma	3404.13	2647.51	12691.1	3227.21	81.7243	1581.95	523.125	2691.51	4544.23	5312.98	901.212	4247.42	1016.29		TCGA-AA-A01T	N1	Colorectal Cancer	Colon Adenocarcinoma	NA		TCGA-AZ-4313-01A	1532			0		TCGA-4N-A93T-01A	146			0
	TCGA_CM_5862	0.7179		TCGA-DM-A1D4-01A	8.9686	45.9011		TCGA-DM-A28F-01A	Primary Solid Tumor	colon adenocarcinoma	9.7569	118.59	0.637074		TCGA-DM-A28F-01A	Primary Solid Tumor	colon adenocarcinoma	4220.93	3648.05	7828.56	25761.1	117.78	2674.09	326.161	8394.46	5408.14	5592.12	866.975	3044.86	2938.71		TCGA-AA-A01V	N0	Colorectal Cancer	Colon Adenocarcinoma	NA		TCGA-G4-6310-01A	1372			0		TCGA-D5-6537-01A	146			1
	TCGA_CM_5863	1		TCGA-DM-A1D8-01A	9.9108	48.3634		TCGA-DM-A28G-01A	Primary Solid Tumor	colon adenocarcinoma	8.7156	0	0.726443		TCGA-DM-A28G-01A	Primary Solid Tumor	colon adenocarcinoma	4453.67	2646.33	7868.35	5014.22	182.11	2954.13	636.239	5214.68	4756.88	14801.4	1054.59	1940.37	2727.36		TCGA-AA-A01X	N1	Colorectal Cancer	Colon Adenocarcinoma	-0.7545		TCGA-DM-A1D4-01A	1825			0		TCGA-A6-A567-01A	1825			0
	TCGA_CM_6161	0.9596		TCGA-DM-A1D9-01A	6.2914	112.018		TCGA-DM-A28H-01A	Primary Solid Tumor	colon adenocarcinoma	12.6482	0	0.80559		TCGA-DM-A28H-01A	Primary Solid Tumor	colon adenocarcinoma	2267.59	6050.59	13006.3	13641.9	240.712	2356.52	422.53	8246.64	4956.13	17085.8	946.245	2555.73	2617.79		TCGA-AA-A01Z	N0	Colorectal Cancer	Colon Adenocarcinoma	-0.4673		TCGA-AY-A69D-01A	543			0		TCGA-AA-3697-01A	1825			0
	TCGA_CM_6162	0.9283		TCGA-DM-A1DA-01A	9.8632	61.1085		TCGA-DM-A28M-01A	Primary Solid Tumor	colon adenocarcinoma	7.2727	77.4404	0.655018		TCGA-DM-A28M-01A	Primary Solid Tumor	colon adenocarcinoma	2997.82	3502.18	6408	15379.6	160.727	1311.64	397.091	6816.73	3909.45	17540.7	701.818	2327.27	2349.45		TCGA-AA-A022	N0	Colorectal Cancer	Colon Adenocarcinoma	NA		TCGA-DM-A28G-01A	1825			0		TCGA-A6-5659-01A	286			0
	TCGA_CM_6163	0.8675		TCGA-DM-A1DB-01A	13.4767	74.4324		TCGA-F4-6459-01A	Primary Solid Tumor	colon adenocarcinoma	22.6399	278.156	1.53095		TCGA-F4-6459-01A	Primary Solid Tumor	colon adenocarcinoma	5222.13	18009	4159.76	103384	788.552	7827	1042.72	36583.1	6217.86	12378.5	1047.84	6365.23	11681.1		TCGA-AA-A029	N0	Colorectal Cancer	Colon Adenocarcinoma	NA		TCGA-AA-3685-01A	1127			0		TCGA-CA-5254-01A	68			0
	TCGA_CM_6164	0.8136		TCGA-DM-A1HA-01A	7.9856	0		TCGA-F4-6460-01A	Primary Solid Tumor	colon adenocarcinoma	32.3253	76.5547	1.17111		TCGA-F4-6460-01A	Primary Solid Tumor	colon adenocarcinoma	4488.53	15127.7	10546.4	44220.5	594.89	7575.6	1023.46	21398.9	4476.54	1422.84	1052.66	3501.04	9810.74		TCGA-AA-A02E	N1	Colorectal Cancer	Colon Adenocarcinoma	NA		TCGA-DM-A1D0-01A	1825			0		TCGA-CM-4744-01A	462			0
	TCGA_CM_6165	0.7925		TCGA-DM-A282-01A	14.0845	137.469		TCGA-F4-6461-01A	Primary Solid Tumor	colon adenocarcinoma	37.3259	314.695	1.18369		TCGA-F4-6461-01A	Primary Solid Tumor	colon adenocarcinoma	4457.38	12088.6	5700.28	64976.6	683.566	7496.38	1081.34	24372.7	5449.58	1067.41	1094.71	1728.13	11262.5		TCGA-AA-A02F	N1	Colorectal Cancer	Colon Adenocarcinoma	NA		TCGA-AZ-6608-01A	59			1		TCGA-DM-A1HA-01A	306			0
	TCGA_CM_6167	1		TCGA-DM-A28A-01A	13.9299	215.976		TCGA-F4-6569-01A	Primary Solid Tumor	colon adenocarcinoma	50.149	454.03	2.26751		TCGA-F4-6569-01A	Primary Solid Tumor	colon adenocarcinoma	5856.75	19369	5328.54	428091	686.466	14505.4	1257.01	102563	4981.19	3631.28	744.014	1594.9	29572.6		TCGA-AA-A02H	N2	Colorectal Cancer	Colon Adenocarcinoma	NA		TCGA-AM-5821-01A	28			0		TCGA-DM-A28E-01A	453			0
	TCGA_CM_6168	0.8358		TCGA-DM-A28C-01A	2.061	211.977		TCGA-F4-6570-01A	Primary Solid Tumor	colon adenocarcinoma	36.0187	161.018	1.57123		TCGA-F4-6570-01A	Primary Solid Tumor	colon adenocarcinoma	8531.61	17358.4	9245.4	190225	594.749	6372.68	636.038	50872.5	5752.46	1250.55	731.795	2535.81	23597.4		TCGA-AA-A02J	N0	Colorectal Cancer	Colon Adenocarcinoma	NA		TCGA-AA-A01X-01A	791			0		TCGA-AD-6888-01A	404			0
	TCGA_CM_6169	1		TCGA-DM-A28E-01A	6.7355	0		TCGA-F4-6703-01A	Primary Solid Tumor	colon adenocarcinoma	55.6615	112.789	2.64629		TCGA-F4-6703-01A	Primary Solid Tumor	colon adenocarcinoma	8895.54	24665.7	5741.52	500073	496.378	11289	1744.95	121369	9712.54	9025.92	788.792	2186.81	30335.4		TCGA-AA-A02K	N2	Colorectal Cancer	Colon Adenocarcinoma	-0.4759		TCGA-AZ-6599-01A	206			1		TCGA-A6-5666-01A	362			0
	TCGA_CM_6170	0.9106		TCGA-DM-A28F-01A	9.7569	118.59		TCGA-F4-6805-01A	Primary Solid Tumor	colon adenocarcinoma	26.3934	136.552	1.40614		TCGA-F4-6805-01A	Primary Solid Tumor	colon adenocarcinoma	6617.44	15726.5	6674.72	151113	346.483	6400.67	919.276	46203	5615.05	8948.48	826.618	2026.11	14756.7		TCGA-AA-A02O	N0	Colorectal Cancer	Colon Adenocarcinoma	NA		TCGA-D5-6537-01A	146			1		TCGA-F4-6808-01A	328			0
	TCGA_CM_6171	0.9106		TCGA-DM-A28G-01A	8.7156	0		TCGA-F4-6806-01A	Primary Solid Tumor	colon adenocarcinoma	12.7261	0	0.901514		TCGA-F4-6806-01A	Primary Solid Tumor	colon adenocarcinoma	4540.52	6737.44	6785.67	37304.1	297.388	4516.41	765.573	16091.1	4975.89	9265.91	1044.21	2656.4	5006.05		TCGA-AA-A02R	N0	Colorectal Cancer	Colon Adenocarcinoma	NA		TCGA-QL-A97D-01A	666			0		TCGA-QG-A5YV-01A	456			0
	TCGA_CM_6172	0.9645		TCGA-DM-A28H-01A	12.6482	0		TCGA-F4-6807-01A	Primary Solid Tumor	colon adenocarcinoma	27.9214	77.6927	1.43552		TCGA-F4-6807-01A	Primary Solid Tumor	colon adenocarcinoma	6313.34	11186.7	8053.77	105639	635.471	9445.19	1424.51	42373.3	6037.75	3379.01	908.997	2863.5	15693.6		TCGA-AA-A02W	N0	Colorectal Cancer	Colon Adenocarcinoma	NA		TCGA-DM-A1HA-01A	1825			0		TCGA-AA-A02Y-01A	293			0
	TCGA_CM_6675	0.9278		TCGA-DM-A28M-01A	7.2727	77.4404		TCGA-F4-6808-01A	Primary Solid Tumor	colon adenocarcinoma	12.4334	0	0.763647		TCGA-F4-6808-01A	Primary Solid Tumor	colon adenocarcinoma	4451.15	5638.84	10047.4	24683.8	129.662	2471.28	551.806	8730.02	4803.43	7606.28	623.446	3597.39	3357.61		TCGA-AA-A02Y	N0	Colorectal Cancer	Colon Adenocarcinoma	-1.1394		TCGA-AZ-4315-01A	1776			0		TCGA-DM-A28H-01A	92			1
	TCGA_CM_6676	0.8421		TCGA-F4-6459-01A	22.6399	278.156		TCGA-F4-6809-01A	Primary Solid Tumor	colon adenocarcinoma	38.1356	161.448	1.45132		TCGA-F4-6809-01A	Primary Solid Tumor	colon adenocarcinoma	6025	9421.61	9414.41	41410.6	944.491	11942.8	1318.22	23219.5	5740.68	7421.61	1032.2	3412.29	17757.7		TCGA-AA-A03J	N0	Colorectal Cancer	Colon Adenocarcinoma	NA		TCGA-A6-6652-01A	456			0		TCGA-A6-5656-01A	1127			0
	TCGA_CM_6677	0.766		TCGA-F4-6460-01A	32.3253	76.5547		TCGA-F4-6854-01A	Primary Solid Tumor	colon adenocarcinoma	31.9694	142.604	0.979666		TCGA-F4-6854-01A	Primary Solid Tumor	colon adenocarcinoma	4073.32	12954.9	7148.64	42988.4	310.312	5807.66	1002.87	16425.3	4845.45	6983.23	848.232	3051.34	7420.37		TCGA-AD-6548	N0	Colorectal Cancer	Colon Adenocarcinoma	0.3333		TCGA-G4-6294-01A	858			1		TCGA-SS-A7HO-01A	1765			0
	TCGA_CM_6678	0.929		TCGA-F4-6461-01A	37.3259	314.695		TCGA-F4-6855-01A	Primary Solid Tumor	colon adenocarcinoma	36.0007	291.762	1.77622		TCGA-F4-6855-01A	Primary Solid Tumor	colon adenocarcinoma	5634.43	16170.8	6886.6	270078	429.39	9724.76	1063	73137.6	5163.8	5613.48	1010.64	2396.99	21942.4		TCGA-AD-6888	N1b	Colorectal Cancer	Colon Adenocarcinoma	-1.1682		TCGA-A6-5662-01A	453			0		TCGA-AA-3492-01A	1825			0
	TCGA_CM_6679	0.9252		TCGA-F4-6569-01A	50.149	454.03		TCGA-G4-6293-01A	Primary Solid Tumor	colon adenocarcinoma	18.0276	0	0.837582		TCGA-G4-6293-01A	Primary Solid Tumor	colon adenocarcinoma	6737.01	11554.6	7418.88	18877	297.985	3550.37	492.577	9361.08	5666.49	6030.75	700.424	3201.48	5612.49		TCGA-AD-6889	N0	Colorectal Cancer	Colon Adenocarcinoma	-0.9523		TCGA-AZ-4682-01B	680			1		TCGA-AA-3509-01A	212			0
	TCGA_CM_6680	0.8533		TCGA-F4-6570-01A	36.0187	161.018		TCGA-G4-6294-01A	Primary Solid Tumor	colon adenocarcinoma	7.8786	51.3801	0.865		TCGA-G4-6294-01A	Primary Solid Tumor	colon adenocarcinoma	3604.68	3755.76	16730.9	7583.36	139.961	3935.58	745.684	7765.5	4680.8	3245.51	1495.54	6791.8	2709.3		TCGA-AD-6890	N0	Colorectal Cancer	Colon Adenocarcinoma	0.1611		TCGA-AA-3675-01A	1431			0		TCGA-AA-3675-01A	1431			0
	TCGA_D5_5537	0.9668		TCGA-F4-6703-01A	55.6615	112.789		TCGA-G4-6295-01A	Primary Solid Tumor	colon adenocarcinoma	6.8035	153.804	0.883331		TCGA-G4-6295-01A	Primary Solid Tumor	colon adenocarcinoma	2419.63	3977.65	15632.1	13894.3	135.585	2186.85	826.145	5563.36	5623.13	12089.9	888.835	3057.22	4266.4		TCGA-AD-6895	N1a	Colorectal Cancer	Colon Adenocarcinoma	-0.0759		TCGA-CM-4744-01A	214			0		TCGA-A6-6652-01A	791			0
	TCGA_D5_5538	0.8185		TCGA-F4-6805-01A	26.3934	136.552		TCGA-G4-6297-01A	Primary Solid Tumor	colon adenocarcinoma	23.4899	154.699	1.62768		TCGA-G4-6297-01A	Primary Solid Tumor	colon adenocarcinoma	6880.63	16090.6	14324.1	211669	604.506	7343.72	648.13	48860.5	4837.01	2558.49	878.236	5878.72	15690.5		TCGA-AD-6901	N0	Colorectal Cancer	Colon Adenocarcinoma	1.3843		TCGA-A6-5660-01A	342			0		TCGA-A6-5665-01A	1216			0
	TCGA_D5_5539	0.9325		TCGA-F4-6806-01A	12.7261	0		TCGA-G4-6298-01A	Primary Solid Tumor	colon adenocarcinoma	10.5791	0	0.992206		TCGA-G4-6298-01A	Primary Solid Tumor	colon adenocarcinoma	5358.57	5731.63	10436.5	91739.4	218.82	3295.1	349.109	18754.5	5218.82	15012.2	824.053	3856.9	5717.71		TCGA-AD-6963	N0	Colorectal Cancer	Colon Adenocarcinoma	-0.4289		TCGA-DM-A28M-01A	1825			0		TCGA-AA-3495-01A	472			1
	TCGA_D5_5541	0.8842		TCGA-F4-6807-01A	27.9214	77.6927		TCGA-G4-6299-01A	Primary Solid Tumor	colon adenocarcinoma	19.1083	0	0.969533		TCGA-G4-6299-01A	Primary Solid Tumor	colon adenocarcinoma	4464.06	7829.39	5839.4	97576	316.197	5834.85	461.783	24264.3	5688.35	639.672	672.884	1533.21	12290.2		TCGA-AD-6964	N2b	Colorectal Cancer	Colon Adenocarcinoma	0.8482		TCGA-AA-3663-01A	212			0		TCGA-CK-5914-01A	746			0
	TCGA_D5_6529	0.8608		TCGA-F4-6808-01A	12.4334	0		TCGA-G4-6303-01A	Primary Solid Tumor	colon adenocarcinoma	17.8956	97.7064	0.893746		TCGA-G4-6303-01A	Primary Solid Tumor	colon adenocarcinoma	4322.81	7420.12	7571.19	41437.2	285.985	3816.91	637.701	13361.4	3538.16	8425.02	1485.33	2981.33	6580.4		TCGA-AD-6965	N2b	Colorectal Cancer	Colon Adenocarcinoma	-0.5444		TCGA-QG-A5YV-01A	1301			0		TCGA-A6-5662-01A	500			0
	TCGA_D5_6530	0.9458		TCGA-F4-6809-01A	38.1356	161.448		TCGA-G4-6304-01A	Primary Solid Tumor	colon adenocarcinoma	4.3668	89.6117	0.578261		TCGA-G4-6304-01A	Primary Solid Tumor	colon adenocarcinoma	2416.59	1791.27	5799.13	11729.3	180.786	824.454	274.236	4150.22	2979.91	18168.6	627.074	2552.84	2447.16		TCGA-AD-A5EJ	N0	Colorectal Cancer	Colon Adenocarcinoma	0.0342		TCGA-G4-6295-01A	254			0		TCGA-A6-5661-01A	824			0
	TCGA_D5_6531	0.6857		TCGA-F4-6854-01A	31.9694	142.604		TCGA-G4-6306-01A	Primary Solid Tumor	colon adenocarcinoma	0.7037	90.3834	0.468174		TCGA-G4-6306-01A	Primary Solid Tumor	colon adenocarcinoma	3121.75	1533.43	9770.58	3762.14	44.335	855.032	274.455	1788.88	5494.72	302.604	591.133	4747.36	1097.11		TCGA-AD-A5EK	N0	Colorectal Cancer	Colon Adenocarcinoma	0.3921		TCGA-DM-A28E-01A	1825			0		TCGA-AA-A01X-01A	423			0
	TCGA_D5_6532	0.766		TCGA-F4-6855-01A	36.0007	291.762		TCGA-G4-6307-01A	Primary Solid Tumor	colon adenocarcinoma	11.408	40.5178	0.621563		TCGA-G4-6307-01A	Primary Solid Tumor	colon adenocarcinoma	4405.28	3204.74	6641.55	12276.2	157.911	2161.81	373.762	5866.11	2691.98	9203.24	671.87	2546.68	2373.63		TCGA-AM-5820	N2	Colorectal Cancer	Colon Adenocarcinoma	-0.0456		TCGA-A6-5661-01A	306			0		TCGA-NH-A50T-01A	588			0
	TCGA_D5_6533	0.6857		TCGA-G4-6293-01A	18.0276	0		TCGA-G4-6309-01A	Primary Solid Tumor	colon adenocarcinoma	11.8913	98.1004	0.732044		TCGA-G4-6309-01A	Primary Solid Tumor	colon adenocarcinoma	3847.11	5375.99	6941.11	20859	159.117	2016.42	249.717	9105.32	6731.03	11185.2	713.477	3006.23	2860.46		TCGA-AM-5821	N0	Colorectal Cancer	Colon Adenocarcinoma	-0.7531		TCGA-AY-5543-01A	479			0		TCGA-AY-6197-01A	1002			0
	TCGA_D5_6534	0.9521		TCGA-G4-6294-01A	7.8786	51.3801		TCGA-G4-6310-01A	Primary Solid Tumor	colon adenocarcinoma	8.982	90.8867	1.04921		TCGA-G4-6310-01A	Primary Solid Tumor	colon adenocarcinoma	6559.13	5360.78	14506.7	18521	217.814	7470.06	1187.87	10895.2	4922.9	4668.41	1241.77	4017.96	7655.5		TCGA-AU-3779	N0	Colorectal Cancer	Colon Adenocarcinoma	-0.3515		TCGA-DM-A1D9-01A	1825			0		TCGA-AD-A5EK-01A	1825			0
	TCGA_D5_6535	0.6292		TCGA-G4-6295-01A	6.8035	153.804		TCGA-G4-6311-01A	Primary Solid Tumor	colon adenocarcinoma	13.6411	129.03	1.23494		TCGA-G4-6311-01A	Primary Solid Tumor	colon adenocarcinoma	5044.07	7401.36	10710.9	175573	348.898	4033.05	531.48	32313.7	6327.91	6182.06	919.202	4292.76	11440		TCGA-AU-6004	N0	Colorectal Cancer	Colon Adenocarcinoma	0.3275		TCGA-DM-A0XF-01A	1162			1		TCGA-AZ-6606-01A	206			1
	TCGA_D5_6536	0.8358		TCGA-G4-6297-01A	23.4899	154.699		TCGA-G4-6314-01A	Primary Solid Tumor	colon adenocarcinoma	37.4234	195.868	1.59616		TCGA-G4-6314-01A	Primary Solid Tumor	colon adenocarcinoma	4595.76	15633.5	10923.3	192015	592.752	9071.08	844.822	44511.5	4824.17	9035.81	1055.6	2897.52	14499.3		TCGA-AY-4070	N2	Colorectal Cancer	Colon Adenocarcinoma	NA		TCGA-AZ-5407-01A	1825			0		TCGA-AY-A71X-01A	357			1
	TCGA_D5_6538	0.8421		TCGA-G4-6298-01A	10.5791	0		TCGA-G4-6315-01A	Primary Solid Tumor	colon adenocarcinoma	21.0797	94.8268	0.725955		TCGA-G4-6315-01A	Primary Solid Tumor	colon adenocarcinoma	3656.56	8832.39	8814.4	7112.6	172.237	2286.89	760.925	6524.94	5623.65	7058.61	753.727	2918.25	2528.53		TCGA-AY-4071	N0	Colorectal Cancer	Colon Adenocarcinoma	NA		TCGA-QG-A5YX-01A	1003			0		TCGA-CM-6166-01A	93			0
	TCGA_D5_6539	0.8533		TCGA-G4-6299-01A	19.1083	0		TCGA-G4-6317-01A	Primary Solid Tumor	colon adenocarcinoma	4.3692	27.8172	0.560914		TCGA-G4-6317-01A	Primary Solid Tumor	colon adenocarcinoma	2836.16	1151.28	9325.51	10494.3	62.8072	1837.79	415.074	4782.09	3781.54	9277.99	692.518	3531.4	1275.81		TCGA-AY-5543	N1a	Colorectal Cancer	Colon Adenocarcinoma	-0.9041		TCGA-AD-6889-01A	1825			0		TCGA-AZ-4684-01A	371			0
	TCGA_D5_6540	0.8254		TCGA-G4-6303-01A	17.8956	97.7064		TCGA-G4-6320-01A	Primary Solid Tumor	colon adenocarcinoma	11.4926	111.774	0.542979		TCGA-G4-6320-01A	Primary Solid Tumor	colon adenocarcinoma	2195.09	2167.26	8656.35	11622.6	212.311	2328.16	263.725	5299.9	3730.26	891.584	820.209	2161.21	2392.04		TCGA-AY-6197	N0	Colorectal Cancer	Colon Adenocarcinoma	-0.6839		TCGA-A6-5656-01A	462			0		TCGA-AZ-4615-01A	304			0
	TCGA_D5_6541	0.8791		TCGA-G4-6304-01A	4.3668	89.6117		TCGA-G4-6321-01A	Primary Solid Tumor	colon adenocarcinoma	2.635	0	0.759707		TCGA-G4-6321-01A	Primary Solid Tumor	colon adenocarcinoma	22439.4	735.837	3797.1	3564.56	41.502	868.248	503.294	2098.81	9762.19	1907.11	526.351	2448.62	2893.28		TCGA-AY-6386	N1a	Colorectal Cancer	Colon Adenocarcinoma	-0.6242		TCGA-G4-6323-01A	419			0		TCGA-AD-6890-01A	214			0
	TCGA_D5_6898	0.8136		TCGA-G4-6306-01A	0.7037	90.3834		TCGA-G4-6323-01A	Primary Solid Tumor	colon adenocarcinoma	5.342	124.727	0.608287		TCGA-G4-6323-01A	Primary Solid Tumor	colon adenocarcinoma	5151.51	1939.75	6515.51	2792.7	223.179	1876.79	441.608	3022.41	5323.64	924.766	1162.19	1995.55	3151.66		TCGA-AY-A54L	N0	Colorectal Cancer	Colon Adenocarcinoma	-1.2023		TCGA-NH-A50T-01A	553			0		TCGA-CM-6170-01A	607			0
	TCGA_D5_6920	0.9458		TCGA-G4-6307-01A	11.408	40.5178		TCGA-G4-6586-01A	Primary Solid Tumor	colon adenocarcinoma	16.5887	7.7645	0.636151		TCGA-G4-6586-01A	Primary Solid Tumor	colon adenocarcinoma	3598.04	2093.15	10105.5	11353.9	80.3913	916.631	455.551	4023.82	4882.6	7357.29	655.466	5405.78	2960.87		TCGA-AY-A69D	N0	Colorectal Cancer	Colon Adenocarcinoma	-0.7213		TCGA-G4-6317-01A	1095			0		TCGA-G4-6298-01A	424			0
	TCGA_D5_6922	0.9009		TCGA-G4-6309-01A	11.8913	98.1004		TCGA-G4-6588-01A	Primary Solid Tumor	colon adenocarcinoma	13.0195	72.343	0.818099		TCGA-G4-6588-01A	Primary Solid Tumor	colon adenocarcinoma	4903.86	6823.74	7850.78	65509.8	127.692	2194.79	416.625	15236.4	4699.55	9311.47	722.584	2124.69	6656.27		TCGA-AY-A71X	N0	Colorectal Cancer	Colon Adenocarcinoma	-1.0523		TCGA-G4-6304-01A	1631			0		TCGA-AA-3506-01A	242			0
	TCGA_D5_6923	0.8608		TCGA-G4-6310-01A	8.982	90.8867		TCGA-G4-6625-01A	Primary Solid Tumor	colon adenocarcinoma	24.9433	122.934	0.959456		TCGA-G4-6625-01A	Primary Solid Tumor	colon adenocarcinoma	5161.9	7432.65	9615.42	40071.7	270.295	5068.93	1026.76	13529.3	5577.32	3084.81	923.356	2951.47	9665.29		TCGA-AY-A8YK	N2a	Colorectal Cancer	Colon Adenocarcinoma	-0.1964		TCGA-AY-A71X-01A	588			0		TCGA-AU-6004-01A	1381			1
	TCGA_D5_6924	0.9106		TCGA-G4-6311-01A	13.6411	129.03		TCGA-G4-6626-01A	Primary Solid Tumor	colon adenocarcinoma	13.1579	61.0183	0.774997		TCGA-G4-6626-01A	Primary Solid Tumor	colon adenocarcinoma	2996.93	5976.32	11078.5	30506.1	167.544	1786.4	360.526	7275.88	3500	13339	1339.91	2868.42	2592.54		TCGA-AZ-4308	N1	Colorectal Cancer	Colon Adenocarcinoma	NA		TCGA-CA-5256-01A	65			0		TCGA-D5-6927-01A	435			0
	TCGA_D5_6926	0.7843		TCGA-G4-6314-01A	37.4234	195.868		TCGA-G4-6627-01A	Primary Solid Tumor	colon adenocarcinoma	23.617	105.483	1.19143		TCGA-G4-6627-01A	Primary Solid Tumor	colon adenocarcinoma	7837.76	8030.8	8077.53	60876.4	439.995	6484.92	1074.06	21038.6	6433.58	8198.18	900.526	2861.25	11761.8		TCGA-AZ-4313	N0	Colorectal Cancer	Colon Adenocarcinoma	-0.7138		TCGA-A6-A567-01A	1825			0		TCGA-F4-6806-01A	287			0
	TCGA_D5_6927	1		TCGA-G4-6315-01A	21.0797	94.8268		TCGA-G4-6628-01A	Primary Solid Tumor	colon adenocarcinoma	14.9254	153.157	0.918002		TCGA-G4-6628-01A	Primary Solid Tumor	colon adenocarcinoma	4473.88	5955.22	9277.78	26018.2	128.109	2732.17	758.292	9264.1	6433.25	13233.4	655.473	2633.91	9807.54		TCGA-AZ-4315	N0	Colorectal Cancer	Colon Adenocarcinoma	-0.787		TCGA-QG-A5Z2-01A	952			0		TCGA-NH-A8F8-01A	1825			0
	TCGA_D5_6928	0.9143		TCGA-G4-6317-01A	4.3692	27.8172		TCGA-NH-A50T-01A	Primary Solid Tumor	colon adenocarcinoma	4.4873	0	0.877567		TCGA-NH-A50T-01A	Primary Solid Tumor	colon adenocarcinoma	2474.76	5030.29	18489.6	21829.5	156.608	1558	166.031	8285.39	6191.16	21127.2	665.47	4919	2829.71		TCGA-AZ-4323	N2	Colorectal Cancer	Colon Adenocarcinoma	5.0399		TCGA-D5-6530-01A	621			0		TCGA-CA-6716-01A	1825			0
	TCGA_D5_6929	0.9043		TCGA-G4-6320-01A	11.4926	111.774		TCGA-NH-A50V-01A	Primary Solid Tumor	colon adenocarcinoma	19.2749	126.654	0.983913		TCGA-NH-A50V-01A	Primary Solid Tumor	colon adenocarcinoma	6521.34	8875.17	6720.06	50645.3	324.461	6702.16	515.833	20038.1	5632.86	681.505	1403.4	3184.49	6912.68		TCGA-AZ-4614	N1	Colorectal Cancer	Colon Adenocarcinoma	-0.5973		TCGA-AZ-4615-01A	1002			0		TCGA-CA-5255-01A	1825			0
	TCGA_D5_6930	0.9043		TCGA-G4-6321-01A	2.635	0		TCGA-NH-A5IV-01A	Primary Solid Tumor	colon adenocarcinoma	23.9803	339.062	0.756089		TCGA-NH-A5IV-01A	Primary Solid Tumor	colon adenocarcinoma	3821.52	7847.86	5820.93	34900.4	217.789	2660.25	683.243	11199.2	3356.86	4174.94	1041.77	1377.1	8089.77		TCGA-AZ-4615	N1	Colorectal Cancer	Colon Adenocarcinoma	-1.0849		TCGA-A6-5665-01A	404			0		TCGA-CM-4751-01A	1825			0
	TCGA_D5_6931	0.9209		TCGA-G4-6323-01A	5.342	124.727		TCGA-NH-A6GA-01A	Primary Solid Tumor	colon adenocarcinoma	15.6654	66.9724	0.638102		TCGA-NH-A6GA-01A	Primary Solid Tumor	colon adenocarcinoma	2528.39	5118.05	5590.1	10230.5	225.929	3484.33	392.679	7437.92	4765.41	1930.32	1162.02	1814.4	5881.2		TCGA-AZ-4616	N2	Colorectal Cancer	Colon Adenocarcinoma	0.2072		TCGA-AA-3697-01A	1825			0		TCGA-AA-3511-01A	481			0
	TCGA_D5_6932	0.8584		TCGA-G4-6586-01A	16.5887	7.7645		TCGA-NH-A6GB-01A	Primary Solid Tumor	colon adenocarcinoma	19.1476	159.048	0.796407		TCGA-NH-A6GB-01A	Primary Solid Tumor	colon adenocarcinoma	2668.31	5411.98	12814.1	37573.8	106.856	1502.78	640.519	9049.41	4628.78	9457.07	744.904	5597.9	3713.61		TCGA-AZ-4681	N0	Colorectal Cancer	Colon Adenocarcinoma	NA		TCGA-D5-5540-01A	411			0		TCGA-G4-6299-01A	1024			0
	TCGA_D5_7000	0.8706		TCGA-G4-6588-01A	13.0195	72.343		TCGA-NH-A8F7-01A	Primary Solid Tumor	colon adenocarcinoma	14.4606	43.0707	0.541443		TCGA-NH-A8F7-01A	Primary Solid Tumor	colon adenocarcinoma	3329.68	2348.22	5507.64	9462.86	126.414	1119.07	584.49	3397.32	6505.89	4547.64	1074.75	1968.05	1641.52		TCGA-AZ-4682	N0	Colorectal Cancer	Colon Adenocarcinoma	-0.7994		TCGA-AA-A02Y-01A	1216			0		TCGA-G4-6293-01A	1825			0
	TCGA_DM_A0XD	0.6292		TCGA-G4-6625-01A	24.9433	122.934		TCGA-NH-A8F8-01A	Primary Solid Tumor	colon adenocarcinoma	19.0904	0	1.00621		TCGA-NH-A8F8-01A	Primary Solid Tumor	colon adenocarcinoma	4363.84	8039.3	7051.09	56868.6	431.78	4797.3	482.875	18720.9	5705.78	10249.9	1087.59	3387.42	7545.92		TCGA-AZ-4684	N2	Colorectal Cancer	Colon Adenocarcinoma	-0.1702		TCGA-CA-5255-01A	93			0		TCGA-D5-6924-01A	715			1
	TCGA_DM_A1D0	1		TCGA-G4-6626-01A	13.1579	61.0183		TCGA-QG-A5YV-01A	Primary Solid Tumor	colon adenocarcinoma	7.0845	0	0.70454		TCGA-QG-A5YV-01A	Primary Solid Tumor	colon adenocarcinoma	3844.53	4485.29	11571.4	11007.4	130.67	2254.45	323.526	6965.66	5430.68	9956.12	730.886	3083.34	2385.51		TCGA-AZ-5403	N0	Colorectal Cancer	Colon Adenocarcinoma	-0.0028		TCGA-G4-6321-01A	672			0		TCGA-AZ-6599-01A	1825			0
	TCGA_DM_A1D6	0.466		TCGA-G4-6627-01A	23.617	105.483		TCGA-QG-A5YX-01A	Primary Solid Tumor	colon adenocarcinoma	5.7283	28.2377	0.679045		TCGA-QG-A5YX-01A	Primary Solid Tumor	colon adenocarcinoma	5524.55	3123.16	8270.87	8449.67	103.11	1202.54	454.583	3952.13	7842.88	11105.6	796.236	2730.36	2263.77		TCGA-AZ-5407	N0	Colorectal Cancer	Colon Adenocarcinoma	-0.9397		TCGA-AD-6888-01A	472			1		TCGA-A6-6649-01A	672			0
	TCGA_DM_A1D9	1		TCGA-G4-6628-01A	14.9254	153.157		TCGA-QG-A5Z1-01A	Primary Solid Tumor	colon adenocarcinoma	9.7586	123.387	0.996791		TCGA-QG-A5Z1-01A	Primary Solid Tumor	colon adenocarcinoma	5310	9961.13	9606.8	23736.2	512.829	6627.74	643.055	16766.6	4571.72	2934.3	1494.74	2731.72	6025.89		TCGA-AZ-6598	N0	Colorectal Cancer	Colon Adenocarcinoma	-0.3156		TCGA-AY-A54L-01A	525			0		TCGA-DM-A28G-01A	553			0
	TCGA_DM_A1HB	0.8533		TCGA-NH-A50T-01A	4.4873	0		TCGA-QG-A5Z2-01A	Primary Solid Tumor	colon adenocarcinoma	4.1138	97.7037	0.559629		TCGA-QG-A5Z2-01A	Primary Solid Tumor	colon adenocarcinoma	5000	1638.33	7543.02	5498.11	56.9078	1107.3	334.248	2482.34	4720.95	6254.71	1422.01	1462.8	2268.95		TCGA-AZ-6599	N0	Colorectal Cancer	Colon Adenocarcinoma	-0.773		TCGA-DM-A28C-01A	1825			0		TCGA-D5-5537-01A	511			1
	TCGA_DM_A285	0.8972		TCGA-NH-A50V-01A	19.2749	126.654		TCGA-QL-A97D-01A	Primary Solid Tumor	colon adenocarcinoma	8.0302	243.349	0.737729		TCGA-QL-A97D-01A	Primary Solid Tumor	colon adenocarcinoma	2934.34	4675.48	14137.5	5569.67	134.152	2181.86	412.376	4290.51	4869.63	6908.36	1296.17	4879.07	3758.62		TCGA-AZ-6600	N1	Colorectal Cancer	Colon Adenocarcinoma	0.7606		TCGA-AA-3502-01A	1065			0		TCGA-G4-6321-01A	1301			0
	TCGA_DM_A28A	0.6154		TCGA-NH-A5IV-01A	23.9803	339.062		TCGA-RU-A8FL-01A	Primary Solid Tumor	colon adenocarcinoma	10.8992	15.233	0.606519		TCGA-RU-A8FL-01A	Primary Solid Tumor	colon adenocarcinoma	2509.08	1384.65	14368.8	1452.32	68.574	885.105	381.925	1485.01	4439.6	9342.42	710.263	5046.32	1122.62		TCGA-AZ-6601	N0	Colorectal Cancer	Colon Adenocarcinoma	0.4787		TCGA-G4-6306-01A	1359			0		TCGA-A6-A5ZU-01A	1825			0
	TCGA_DM_A28G	1		TCGA-NH-A6GA-01A	15.6654	66.9724		TCGA-SS-A7HO-01A	Primary Solid Tumor	colon adenocarcinoma	24.8045	0	0.951096		TCGA-SS-A7HO-01A	Primary Solid Tumor	colon adenocarcinoma	1761.56	14181.7	9783.86	10309.5	332.468	2225.44	1593.15	8065.39	4281.61	8080.62	1241.1	3280.73	3485.69		TCGA-AZ-6603	N1	Colorectal Cancer	Colon Adenocarcinoma	0.3905
	TCGA_DM_A28H	0.8358		TCGA-NH-A6GB-01A	19.1476	159.048		TCGA-T9-A92H-01A	Primary Solid Tumor	colon adenocarcinoma	13.4623	16.0681	0.748237		TCGA-T9-A92H-01A	Primary Solid Tumor	colon adenocarcinoma	4559.11	4271.77	10993.3	16471.2	228.018	1791.33	276.399	5910.81	5740.85	10641.6	914.598	4513.67	2110.22		TCGA-AZ-6605	N1	Colorectal Cancer	Colon Adenocarcinoma	1.624
	TCGA_DM_A28K	0.8889		TCGA-NH-A8F7-01A	14.4606	43.0707																										TCGA-AZ-6606	N2	Colorectal Cancer	Colon Adenocarcinoma	-0.5245
	TCGA_F4_6459	0.8642		TCGA-NH-A8F8-01A	19.0904	0																										TCGA-AZ-6607	N2	Colorectal Cancer	Colon Adenocarcinoma	-0.5441
	TCGA_F4_6460	0.9458		TCGA-QG-A5YV-01A	7.0845	0																										TCGA-AZ-6608	N1	Colorectal Cancer	Colon Adenocarcinoma	-0.7431
	TCGA_F4_6461	0.8675		TCGA-QG-A5YX-01A	5.7283	28.2377																										TCGA-CA-5254	N0	Colorectal Cancer	Colon Adenocarcinoma	-0.6252
	TCGA_F4_6463	0.9498		TCGA-QG-A5Z1-01A	9.7586	123.387																										TCGA-CA-5255	N0	Colorectal Cancer	Colon Adenocarcinoma	-1.1557
	TCGA_F4_6569	0.8378		TCGA-QG-A5Z2-01A	4.1138	97.7037																										TCGA-CA-5256	N0	Colorectal Cancer	Colon Adenocarcinoma	-1.0523
	TCGA_F4_6570	0.9106		TCGA-QL-A97D-01A	8.0302	243.349																										TCGA-CA-5797	N0	Colorectal Cancer	Colon Adenocarcinoma	0.1831
	TCGA_F4_6703	0.916		TCGA-RU-A8FL-01A	10.8992	15.233																										TCGA-CA-6715	N1	Colorectal Cancer	Colon Adenocarcinoma	0.0408
	TCGA_F4_6704	0.869		TCGA-SS-A7HO-01A	24.8045	0																										TCGA-CA-6716	N0	Colorectal Cancer	Colon Adenocarcinoma	0.3984
	TCGA_F4_6704_Norm	0.8911		TCGA-T9-A92H-01A	13.4623	16.0681																										TCGA-CA-6718	N0	Colorectal Cancer	Colon Adenocarcinoma	-0.0703
	TCGA_F4_6805	0.8675		TCGA-A6-2671-11A	16.3522	0																										TCGA-CA-6719	N0	Colorectal Cancer	Colon Adenocarcinoma	0.6926
	TCGA_F4_6806	0.7442		TCGA-A6-2675-11A	25.0976	130.826																										TCGA-CK-4947	N1	Colorectal Cancer	Colon Adenocarcinoma	-0.5109
	TCGA_F4_6807	0.9185		TCGA-A6-2678-11A	17.6626	130.149																										TCGA-CK-4948	N1	Colorectal Cancer	Colon Adenocarcinoma	0.5432
	TCGA_F4_6809	0.5926		TCGA-A6-2679-11A	14.8441	236.33																										TCGA-CK-5912	N0	Colorectal Cancer	Colon Adenocarcinoma	-0.3232
	TCGA_F4_6854	0.8308		TCGA-A6-2680-11A	14.7469	0																										TCGA-CK-5913	N0	Colorectal Cancer	Colon Adenocarcinoma	-0.1854
	TCGA_F4_6855	0.829		TCGA-A6-2682-11A	8.8862	0																										TCGA-CK-5914	N1	Colorectal Cancer	Colon Adenocarcinoma	-0.2578
	TCGA_F4_6856	0.8889		TCGA-A6-2683-11A	15.2068	143.136																										TCGA-CK-5915	N0	Colorectal Cancer	Colon Adenocarcinoma	-0.7843
	TCGA_G4_6293	0.9134		TCGA-A6-2684-11A	9.8292	120.613																										TCGA-CK-5916	N0	Colorectal Cancer	Colon Adenocarcinoma	-0.5753
	TCGA_G4_6294	0.9076		TCGA-A6-2685-11A	7.0491	174.984																										TCGA-CK-6746	N0	Colorectal Cancer	Colon Adenocarcinoma	-0.8661
	TCGA_G4_6297	0.8706		TCGA-A6-2686-11A	16.3354	108.9																										TCGA-CK-6747	N0	Colorectal Cancer	Colon Adenocarcinoma	-0.2289
	TCGA_G4_6299	0.8479		TCGA-A6-5659-11A	9.7033	95.0341																										TCGA-CM-4743	N0	Colorectal Cancer	Colon Adenocarcinoma	0.3752
	TCGA_G4_6302	0.9357		TCGA-A6-5662-11A	22.2965	0																										TCGA-CM-4744	N0	Colorectal Cancer	Colon Adenocarcinoma	-0.8305
	TCGA_G4_6303	0.9076		TCGA-A6-5665-11A	7.0216	0																										TCGA-CM-4746	N0	Colorectal Cancer	Colon Adenocarcinoma	NA
	TCGA_G4_6309	0.7273		TCGA-A6-5667-11A	19.4797	0																										TCGA-CM-4747	N1b	Colorectal Cancer	Colon Adenocarcinoma	-0.0865
	TCGA_G4_6311	0.8396		TCGA-AA-3489-11A	5.102	0																										TCGA-CM-4750	N1b	Colorectal Cancer	Colon Adenocarcinoma	NA
	TCGA_G4_6314	0.8972		TCGA-AA-3496-11A	18.7126	0																										TCGA-CM-4751	N1b	Colorectal Cancer	Colon Adenocarcinoma	-0.1821
	TCGA_G4_6315	1		TCGA-AA-3511-11A	11.0251	171.245																										TCGA-CM-4752	N0	Colorectal Cancer	Colon Adenocarcinoma	NA
	TCGA_G4_6321	1		TCGA-AA-3514-11A	6.3063	96.3197																										TCGA-CM-5341	N1a	Colorectal Cancer	Colon Adenocarcinoma	NA
	TCGA_G4_6322	0.6207		TCGA-AA-3517-11A	15.6423	183.771																										TCGA-CM-5344	N1b	Colorectal Cancer	Colon Adenocarcinoma	0.7879
	TCGA_G4_6588	0.9737		TCGA-AA-3518-11A	12.7971	27.1973																										TCGA-CM-5348	N1a	Colorectal Cancer	Colon Adenocarcinoma	-0.0684
	TCGA_G4_6625	0.8		TCGA-AA-3520-11A	17.337	127.243																										TCGA-CM-5349	N0	Colorectal Cancer	Colon Adenocarcinoma	0.6987
	TCGA_G4_6627	0.929		TCGA-AA-3522-11A	6.6996	117.056																										TCGA-CM-5860	N0	Colorectal Cancer	Colon Adenocarcinoma	-0.0964
	TCGA_G4_6628	0.8889		TCGA-AA-3525-11A	3.2206	0																										TCGA-CM-5861	N0	Colorectal Cancer	Colon Adenocarcinoma	0.1055
	TCGA_NH_A50T	1		TCGA-AA-3527-11A	14.3407	0																										TCGA-CM-5862	N1a	Colorectal Cancer	Colon Adenocarcinoma	-0.0042
	TCGA_NH_A50U	0.8533		TCGA-AA-3531-11A	15.6375	104.109																										TCGA-CM-5864	N0	Colorectal Cancer	Colon Adenocarcinoma	-0.6744
	TCGA_NH_A50V	0.8		TCGA-AA-3534-11A	16.8986	102.409																										TCGA-CM-5868	N1a	Colorectal Cancer	Colon Adenocarcinoma	-0.2052
	TCGA_NH_A5IV	0.794		TCGA-AA-3655-11A	9.2683	63.966																										TCGA-CM-6161	N0	Colorectal Cancer	Colon Adenocarcinoma	-0.6521
	TCGA_NH_A6GA	0.8791		TCGA-AA-3660-11A	10.2043	97.5339																										TCGA-CM-6163	N0	Colorectal Cancer	Colon Adenocarcinoma	-0.4625
	TCGA_NH_A6GC	0.9106		TCGA-AA-3662-11A	8.6592	39.852																										TCGA-CM-6164	N0	Colorectal Cancer	Colon Adenocarcinoma	0.3094
	TCGA_NH_A8F7	0.9479		TCGA-AA-3663-11A	19.0959	107.848																										TCGA-CM-6165	N0	Colorectal Cancer	Colon Adenocarcinoma	-0.2318
	TCGA_NH_A8F8	0.8		TCGA-AA-3697-11A	18.1818	162.286																										TCGA-CM-6166	N0	Colorectal Cancer	Colon Adenocarcinoma	0.0106
	TCGA_QG_A5YW	0.7979		TCGA-AA-3712-11A	8.2261	0																										TCGA-CM-6167	N2b	Colorectal Cancer	Colon Adenocarcinoma	4.4553
	TCGA_QG_A5YX	0.9436		TCGA-AA-3713-11A	8.1502	0																										TCGA-CM-6168	N0	Colorectal Cancer	Colon Adenocarcinoma	0.3261
	TCGA_QG_A5Z1	0.9027		TCGA-AZ-6598-11A	22.0206	59.8758																										TCGA-CM-6169	N0	Colorectal Cancer	Colon Adenocarcinoma	1.1701
	TCGA_QG_A5Z2	0.7843		TCGA-AZ-6599-11A	28.1562	0.0106																										TCGA-CM-6170	N0	Colorectal Cancer	Colon Adenocarcinoma	-0.495
	TCGA_QL_A97D	0.5217		TCGA-AZ-6600-11A	25.7451	218.396																										TCGA-CM-6171	N0	Colorectal Cancer	Colon Adenocarcinoma	-0.3285
	TCGA_SS_A7HO	0.8972		TCGA-AZ-6601-11A	36.7347	110.713																										TCGA-CM-6172	N1a	Colorectal Cancer	Colon Adenocarcinoma	-0.5637
	TCGA_T9_A92H	0.929		TCGA-AZ-6603-11A	27.8947	193.019																										TCGA-CM-6674	N0	Colorectal Cancer	Colon Adenocarcinoma	0.7756
	TCGA_WS_AB45	0.765		TCGA-AZ-6605-11A	25.4186	0																										TCGA-CM-6675	N2b	Colorectal Cancer	Colon Adenocarcinoma	-0.5789
																																TCGA-CM-6676	N0	Colorectal Cancer	Colon Adenocarcinoma	-0.0702
																																TCGA-CM-6677	N0	Colorectal Cancer	Colon Adenocarcinoma	0.4298
																																TCGA-CM-6678	N1c	Colorectal Cancer	Colon Adenocarcinoma	-0.1453
																																TCGA-CM-6679	N0	Colorectal Cancer	Colon Adenocarcinoma	0.5006
																																TCGA-CM-6680	N2a	Colorectal Cancer	Colon Adenocarcinoma	0.0982
																																TCGA-D5-5537	N2	Colorectal Cancer	Colon Adenocarcinoma	-0.05
																																TCGA-D5-5538	N1b	Colorectal Cancer	Colon Adenocarcinoma	-0.4388
																																TCGA-D5-5540	N0	Colorectal Cancer	Colon Adenocarcinoma	-1.134
																																TCGA-D5-5541	N1a	Colorectal Cancer	Colon Adenocarcinoma	-0.4763
																																TCGA-D5-6529	N0	Colorectal Cancer	Colon Adenocarcinoma	-0.1086
																																TCGA-D5-6530	N0	Colorectal Cancer	Colon Adenocarcinoma	-1.071
																																TCGA-D5-6531	N0	Colorectal Cancer	Colon Adenocarcinoma	0.0639
																																TCGA-D5-6532	N0	Colorectal Cancer	Colon Adenocarcinoma	-0.6339
																																TCGA-D5-6533	N0	Colorectal Cancer	Colon Adenocarcinoma	0.8537
																																TCGA-D5-6535	N1	Colorectal Cancer	Colon Adenocarcinoma	-0.4517
																																TCGA-D5-6536	N0	Colorectal Cancer	Colon Adenocarcinoma	0.7044
																																TCGA-D5-6537	N1a	Colorectal Cancer	Colon Adenocarcinoma	-0.7754
																																TCGA-D5-6538	N2	Colorectal Cancer	Colon Adenocarcinoma	-0.2029
																																TCGA-D5-6539	N0	Colorectal Cancer	Colon Adenocarcinoma	-0.062
																																TCGA-D5-6541	N0	Colorectal Cancer	Colon Adenocarcinoma	-0.0763
																																TCGA-D5-6898	N0	Colorectal Cancer	Colon Adenocarcinoma	-0.0669
																																TCGA-D5-6920	N0	Colorectal Cancer	Colon Adenocarcinoma	-0.0642
																																TCGA-D5-6922	N1	Colorectal Cancer	Colon Adenocarcinoma	0.5173
																																TCGA-D5-6923	N0	Colorectal Cancer	Colon Adenocarcinoma	1.348
																																TCGA-D5-6924	N0	Colorectal Cancer	Colon Adenocarcinoma	0.4829
																																TCGA-D5-6926	N1	Colorectal Cancer	Colon Adenocarcinoma	0.6483
																																TCGA-D5-6927	N0	Colorectal Cancer	Colon Adenocarcinoma	-0.3093
																																TCGA-D5-6929	N1	Colorectal Cancer	Colon Adenocarcinoma	1.0447
																																TCGA-D5-6931	N2	Colorectal Cancer	Colon Adenocarcinoma	-0.6208
																																TCGA-D5-6932	N0	Colorectal Cancer	Colon Adenocarcinoma	1.119
																																TCGA-DM-A0X9	N0	Colorectal Cancer	Colon Adenocarcinoma	-0.21
																																TCGA-DM-A0XD	N0	Colorectal Cancer	Colon Adenocarcinoma	-0.6221
																																TCGA-DM-A0XF	N2	Colorectal Cancer	Colon Adenocarcinoma	-0.9156
																																TCGA-DM-A1D0	N0	Colorectal Cancer	Colon Adenocarcinoma	-0.7367
																																TCGA-DM-A1D4	N0	Colorectal Cancer	Colon Adenocarcinoma	-0.7148
																																TCGA-DM-A1D8	N1	Colorectal Cancer	Colon Adenocarcinoma	-0.6478
																																TCGA-DM-A1D9	N0	Colorectal Cancer	Colon Adenocarcinoma	-0.9054
																																TCGA-DM-A1DA	N2	Colorectal Cancer	Colon Adenocarcinoma	-0.6512
																																TCGA-DM-A1DB	N0	Colorectal Cancer	Colon Adenocarcinoma	-0.394
																																TCGA-DM-A1HA	N2	Colorectal Cancer	Colon Adenocarcinoma	-0.7848
																																TCGA-DM-A28A	N2	Colorectal Cancer	Colon Adenocarcinoma	-0.3617
																																TCGA-DM-A28C	N0	Colorectal Cancer	Colon Adenocarcinoma	-1.2065
																																TCGA-DM-A28E	N0	Colorectal Cancer	Colon Adenocarcinoma	-0.8738
																																TCGA-DM-A28F	N1	Colorectal Cancer	Colon Adenocarcinoma	-0.6587
																																TCGA-DM-A28G	N0	Colorectal Cancer	Colon Adenocarcinoma	-0.7329
																																TCGA-DM-A28H	N2	Colorectal Cancer	Colon Adenocarcinoma	-0.453
																																TCGA-DM-A28M	N0	Colorectal Cancer	Colon Adenocarcinoma	-0.8356
																																TCGA-F4-6459	N2a	Colorectal Cancer	Colon Adenocarcinoma	0.2582
																																TCGA-F4-6460	N1	Colorectal Cancer	Colon Adenocarcinoma	0.9475
																																TCGA-F4-6461	N2	Colorectal Cancer	Colon Adenocarcinoma	1.3034
																																TCGA-F4-6569	N0	Colorectal Cancer	Colon Adenocarcinoma	2.2161
																																TCGA-F4-6570	N0	Colorectal Cancer	Colon Adenocarcinoma	1.2104
																																TCGA-F4-6703	N0	Colorectal Cancer	Colon Adenocarcinoma	2.6084
																																TCGA-F4-6805	N0	Colorectal Cancer	Colon Adenocarcinoma	0.5253
																																TCGA-F4-6806	N0	Colorectal Cancer	Colon Adenocarcinoma	-0.4474
																																TCGA-F4-6807	N2b	Colorectal Cancer	Colon Adenocarcinoma	0.6341
																																TCGA-F4-6808	N0	Colorectal Cancer	Colon Adenocarcinoma	-0.4683
																																TCGA-F4-6809	N1	Colorectal Cancer	Colon Adenocarcinoma	1.361
																																TCGA-F4-6854	N0	Colorectal Cancer	Colon Adenocarcinoma	0.9222
																																TCGA-F4-6855	N0	Colorectal Cancer	Colon Adenocarcinoma	1.2091
																																TCGA-G4-6293	N1	Colorectal Cancer	Colon Adenocarcinoma	-0.0701
																																TCGA-G4-6294	N1	Colorectal Cancer	Colon Adenocarcinoma	-0.7924
																																TCGA-G4-6295	N0	Colorectal Cancer	Colon Adenocarcinoma	-0.8689
																																TCGA-G4-6297	N2	Colorectal Cancer	Colon Adenocarcinoma	0.3187
																																TCGA-G4-6298	N1	Colorectal Cancer	Colon Adenocarcinoma	-0.6002
																																TCGA-G4-6299	N2	Colorectal Cancer	Colon Adenocarcinoma	0.0068
																																TCGA-G4-6303	N1	Colorectal Cancer	Colon Adenocarcinoma	-0.0795
																																TCGA-G4-6304	N0	Colorectal Cancer	Colon Adenocarcinoma	-1.0424
																																TCGA-G4-6306	N0	Colorectal Cancer	Colon Adenocarcinoma	-1.3031
																																TCGA-G4-6307	N1	Colorectal Cancer	Colon Adenocarcinoma	-0.5412
																																TCGA-G4-6309	N1	Colorectal Cancer	Colon Adenocarcinoma	-0.5068
																																TCGA-G4-6310	N1	Colorectal Cancer	Colon Adenocarcinoma	-0.7139
																																TCGA-G4-6311	N1	Colorectal Cancer	Colon Adenocarcinoma	-0.3823
																																TCGA-G4-6314	N2	Colorectal Cancer	Colon Adenocarcinoma	1.3103
																																TCGA-G4-6315	N1	Colorectal Cancer	Colon Adenocarcinoma	0.1471
																																TCGA-G4-6320	N1	Colorectal Cancer	Colon Adenocarcinoma	-0.411
																																TCGA-G4-6321	N1	Colorectal Cancer	Colon Adenocarcinoma	-0.5352
																																TCGA-G4-6323	N0	Colorectal Cancer	Colon Adenocarcinoma	1.2041
																																TCGA-G4-6586	N0	Colorectal Cancer	Colon Adenocarcinoma	-0.973
																																TCGA-G4-6588	N0	Colorectal Cancer	Colon Adenocarcinoma	-0.1725
																																TCGA-G4-6625	N0	Colorectal Cancer	Colon Adenocarcinoma	-0.4265
																																TCGA-G4-6626	N0	Colorectal Cancer	Colon Adenocarcinoma	0.4221
																																TCGA-G4-6627	N0	Colorectal Cancer	Colon Adenocarcinoma	-0.4167
																																TCGA-G4-6628	N0	Colorectal Cancer	Colon Adenocarcinoma	0.3277
																																TCGA-NH-A50T	N0	Colorectal Cancer	Colon Adenocarcinoma	0.8235
																																TCGA-NH-A50V	N2a	Colorectal Cancer	Colon Adenocarcinoma	-1.0338
																																TCGA-NH-A5IV	N0	Colorectal Cancer	Colon Adenocarcinoma	0.3867
																																TCGA-NH-A6GA	N2a	Colorectal Cancer	Colon Adenocarcinoma	0.0187
																																TCGA-NH-A6GB	N2b	Colorectal Cancer	Colon Adenocarcinoma	0.3536
																																TCGA-NH-A8F8	N2b	Colorectal Cancer	Colon Adenocarcinoma	0.2111
																																TCGA-QG-A5YV	N1a	Colorectal Cancer	Colon Adenocarcinoma	NA
																																TCGA-QG-A5YX	N0	Colorectal Cancer	Colon Adenocarcinoma	-0.5497
																																TCGA-QG-A5Z1	N1b	Colorectal Cancer	Colon Adenocarcinoma	0.0055
																																TCGA-QG-A5Z2	N0	Colorectal Cancer	Colon Adenocarcinoma	-0.8489
																																TCGA-QL-A97D	N0	Colorectal Cancer	Colon Adenocarcinoma	-0.1308
																																TCGA-RU-A8FL	N2a	Colorectal Cancer	Colon Adenocarcinoma	-0.9455
																																TCGA-SS-A7HO	N0	Colorectal Cancer	Colon Adenocarcinoma	-0.6586
																																TCGA-T9-A92H	N0	Colorectal Cancer	Colon Adenocarcinoma	-1.0604

## Sheet: Supplementary Figure 1
	Supplementary Figure 1a										Supplementary Figure 1b
		UNC5B exon 8 PSI	SRSF1 cRPKMs	NOVA2 cRPKMs	HNRNAP1 cRPKMs	SRSF3 cRPKMs	HNRNPC cRPKMs	RBFOX2 cRPKMs			NOVA2-HA relative mRNA levels
		56.49	3.92	0.43	169.37	113.63	73.01	0.79				HA	HA-NOVA2
		85.12	45.32	1.87	272.02	149.05	100.44	14.07				0	0.0612
		73.83	23.01	1.81	74.26	35.02	86.79	28.53				0	0.0646
		74.27	51.05	1.1	204.31	93.05	103.55	14.17				0	0.06217
		86.21	33	0.82	212.17	92.28	116.42	17.38
		72.14	51.86	0	1954.58	311.86	204.18	2.22			Supplementary Figure 1c
		93.09	42.77	0.91	98.72	85.57	100.89	34.25			Nova2 relative mRNA levels
		14.69	52.58	15.9	262.25	56.37	78.43	59.51			SiRNA:	Ctr	NOVA2
		38.39	36.9	9.69	201.75	64.07	87.91	45.83				0.0254531	0.0160322
		90.71	15.35	0.48	110.23	48.97	67.39	26.83				0.0292339	0.0149081
		72.92	179.04	0.68	582.5	334.32	374.58	31.82				0.0290087	0.0154077
		96.94	89.96	0.01	902.56	186.01	233.32	9.11
		47.32	144.76	0	1014.3	230.48	338.81	13.82			Supplementary Figure 1d
		92.57	37.28	0.3	173.29	85.47	67.6	10.93			NOVA2 relative mRNA levels
		90.99	43.17	0.61	164.82	82.59	76.43	31.5			ShRNA:	Ctr	NOVA2
		97.87	38.28	0.27	70.79	42.53	40.83	31.08				0.00762338	0.00450739
		67.6	16.33	16.47	96.82	28.67	44.93	11.17				0.00693881	0.00481323
		40.24	74.99	14.07	1547.15	239.48	253.39	20.86				0.00787856	0.00532187
		40.25	116.69	10.78	1125.28	296.68	276.28	30.53
		69.17	206.2	2.25	1469.55	467.31	511.13	33.41			Supplementary Figure 1e
		44.69	134.68	12.62	1006.05	306.25	323.05	36.06			COL4A1 relative mRNA levels
		40.25	120.19	20.59	1059.46	264.47	285.75	30.77				4 h	8 h	12 h
		89.74	21.84	0	143.13	49.22	79.74	45.89				0.0716988	0.072051	0.138554
		68.63	86.93	4.18	109.34	152.6	153.46	59.1				0.0699406	0.079497	0.130729
		100	37.86	0	32.12	76.51	74	53.6				0.0635166	0.0854368	0.131321
		96.33	89.3	4.28	719.94	227.57	343.24	37.92
		84.02	135.25	1.97	642.62	274.63	355.16	45.67
		86.71	47.43	2.81	651.01	168.69	193.13	20.22
		89.1	48.13	2.93	728.13	176.25	212.83	21.36
		61.77	92.26	9.41	886.32	194.89	221.77	52.1
		95.52	21.41	0.06	115.59	55.16	76.46	34.66
		67.6	32.21	16.74	136.62	49.41	96.3	26.34
		35.02	51.64	11.48	240.14	85.96	150.13	46.53
		73.78	27.25	2.1	208.41	106.76	119.42	4.17
		66.38	30.74	0.6	65.63	34.49	47.82	19.24
		82.26	9.97	0.39	155.47	100.17	81.16	7.35
		90.92	46.64	0.01	32.16	55.66	63.5	86.45
		99.38	38.51	0.01	113.15	90.16	99.61	59.51
		78.34	86.22	2.89	1445.15	328.11	321.2	19.21
		80.15	71.73	4.03	1110.77	315.55	364.81	25.89
		83.92	26.2	1.91	115.1	54.1	69.21	11.34
		74.76	25.6	1.06	286.33	134.85	147.34	5.13
		87.96	44.1	4.72	297.14	178.9	93.99	6.06
		79.39	39.61	5.89	195.31	75.32	89.68	10.09
		70.22	83.35	0.29	469.93	220.14	202.5	0.97
		74.1	67.81	0.45	488.15	193.7	163.9	3.35
		90.97	57.19	0.02	60.55	65.18	89.95	71.27
		69.63	41.11	5.19	107.97	50.08	125.09	98.07
		41.7	56.38	21.39	393.72	150.46	168.11	23.31
		22.89	49.14	36.1	328.67	132.9	189.08	45
		81.4	53.82	0.85	1127.68	231.12	220.75	18.39
		76.37	50.14	0.57	514.97	150.69	138.31	24.66
		93.61	37.02	1.07	85.17	65.73	91.57	35.61
		87.06	39.53	0.61	300.7	81.86	136.29	15.2
		94.39	41.95	0.63	202.18	119.16	115.56	17.76
		46.51	30.53	11.04	119.67	80.96	103.54	14.58
		49.91	14.34	3.65	105.22	56.5	78.25	18.43
		55.15	13.93	2.42	93.32	66.44	92.07	6.88
		100	21.79	0.55	65.08	53.25	71.51	25.92
		96.24	39.78	0.47	231.85	77.62	102.6	11.4
		88.1	44.6	1.62	90.54	53.46	108.47	13.76
		81.5	53.01	0.59	288.25	127.08	126.54	5.14
		85.83	49.2	0.53	185.85	94.28	82.72	18.72
		85.87	32.25	4.56	62.75	50.47	66.14	36.77
		87.35	36.4	2.07	114.93	104.38	83.64	21.25
		100	87.43	0.15	204.29	150.28	237.91	2.26
		43.27	38.26	1.41	73.73	60.63	63.37	38.06
		69.18	43.73	1.03	182.5	104.28	96.57	22.73
		59.68	47.71	1.4	268.68	112.33	105.49	11.42
		100	51.08	0	166.32	99.08	104.77	0.26
		84.77	42.57	12.5	309.87	61.72	136.84	28.41

## Sheet: Supplementary Figure 2
	Supplementary Figure 2a
	Nova2 relative mRNA levels
		Spa.	Conf.
		0.00229069	0.0067542
		0.0017481	0.00632436
		0.00216652	0.00826446
	Supplementary Figure 2b
	Nova2 relative mRNA levels
		Spa.	Conf.
		0.011042	0.020006
		0.006001	0.036666
		0.008839	0.038455
		0.006121	0.036973
		0.020712	0.028344
		0.021191	0.029659
	Supplementary Figure 2c
	Nova2 relative mRNA levels
		Spa.	Conf.
		0.00365501	0.00906464
		0.003265	0.00911645
		0.00700776	0.0100794

## Sheet: Supplementary Figure 5
Supplementary Figure 5a					Supplementary Figure 5d							Supplementary Figure 5e
% unc5b exon 8 inclusion					PAV segments across 10 ISV							PAV segments across 10 ISV
MO:	ctr	nova2	nova2+ nova2 mRNA		MO-ctr:	+	-	-	-	-		MO-ctr:	+	-	-
	76.8002	93.2079	93.2079		MO-unc5b:	-	+	+	+	+		MO-unc5b:	-	+	+
	78.6862	94.0837	90.6843		unc5b-Δ8:	-	-	100 pg	150 pg	200 pg		unc5b-Δ8:	-	-	50 pg
	76.1722	92.8264	90.11			7	2	1	5	3			5	3	4
	72.9206	95.3984	93.0796			8	2	5	3	4			4	2	5
	80.2199	94.7016	91.6843			6	2	0	5	2			7	3	6
	74.1	97.6	92.1			5	2	5	4	2			4	0	5
						9	1	0	1	5			8	1	4
						8	5	4	1	6			3	2	4
						5	4	6	5	0				3	4
						4	7	5	6	4				3	2
						5	5	3	6	5				1	2
						7	3	3	4	1				4	2
						6	1	3	5	4				0	4
						5	3	4	5	4				0	1
						7	3	1	2	3					1
						4	2	4	3	2					6
							3	1	3	2					7
							2	5	5	5					0
							1	0	3	4					2
							2	2	4	4					5
							1	2	2	1					2
								1	2	2					6
								1	2	1					4
								1		0
								2		3
								1		4
								7
								6

## Sheet: Supplementary Figure 6
	Supplementary Figure 6c						Supplementary Figure 6d
	% embryos						% embryos
			altered	normal					defect ISV	normal ISV
		rfp	0	100				rfp	0	100
		unc5b-Δ8 (50 pg)	15	85				unc5b-Δ8 (50 pg)	8	92
		unc5b-Δ8 (75 pg)	48	52				unc5b-Δ8 (75 pg)	43	57
		unc5b-Δ8 (100 pg)	64	36				unc5b-Δ8 (100 pg)	63	37
	Supplementary Figure 6e						Supplementary Figure 6f
	% embryos						% embryos
			altered	normal					defect ISV	normal ISV
		rfp	0	100				rfp	0	100
		unc5b-Δ8 (50 pg)	22	78				unc5b-Δ8 (50 pg)	7	93
		unc5b-Δ8 (75 pg)	50	50				unc5b-Δ8 (75 pg)	55	45
		unc5b-Δ8 (100 pg)	77	23				unc5b-Δ8 (100 pg)	57	43

## Sheet: Supplementary Figure 7
	Supplementary Figure 7b
	UNC5B relative mRNA leels
		SH-SY-5Y	HeLa
		0.06665	0.00202
		0.06558	0.00228
		0.06807	0.00199
	Supplementary Figure 7d
	Relative UNC5B surface expression
		FL-HA	Δ8-HA
		0.414473	0.574465
		0.261308	0.283981
		0.300778	0.0789103
		0.444405	0.669824
	Supplementary Figure 7e
	KD (μm)
		FL	Δ8
		3	5
		8.9	11
		10	4.7

[truncated: 5 more sheets: Supplementary Figure 8, Supplementary Figure 10, Supplementary Figure 11, Supplementary Figure 12, Supplementary Figure 14]
